# Supplementary material
Source: PubMed Central journal article supplement (PMC4984558)

# Figure S1

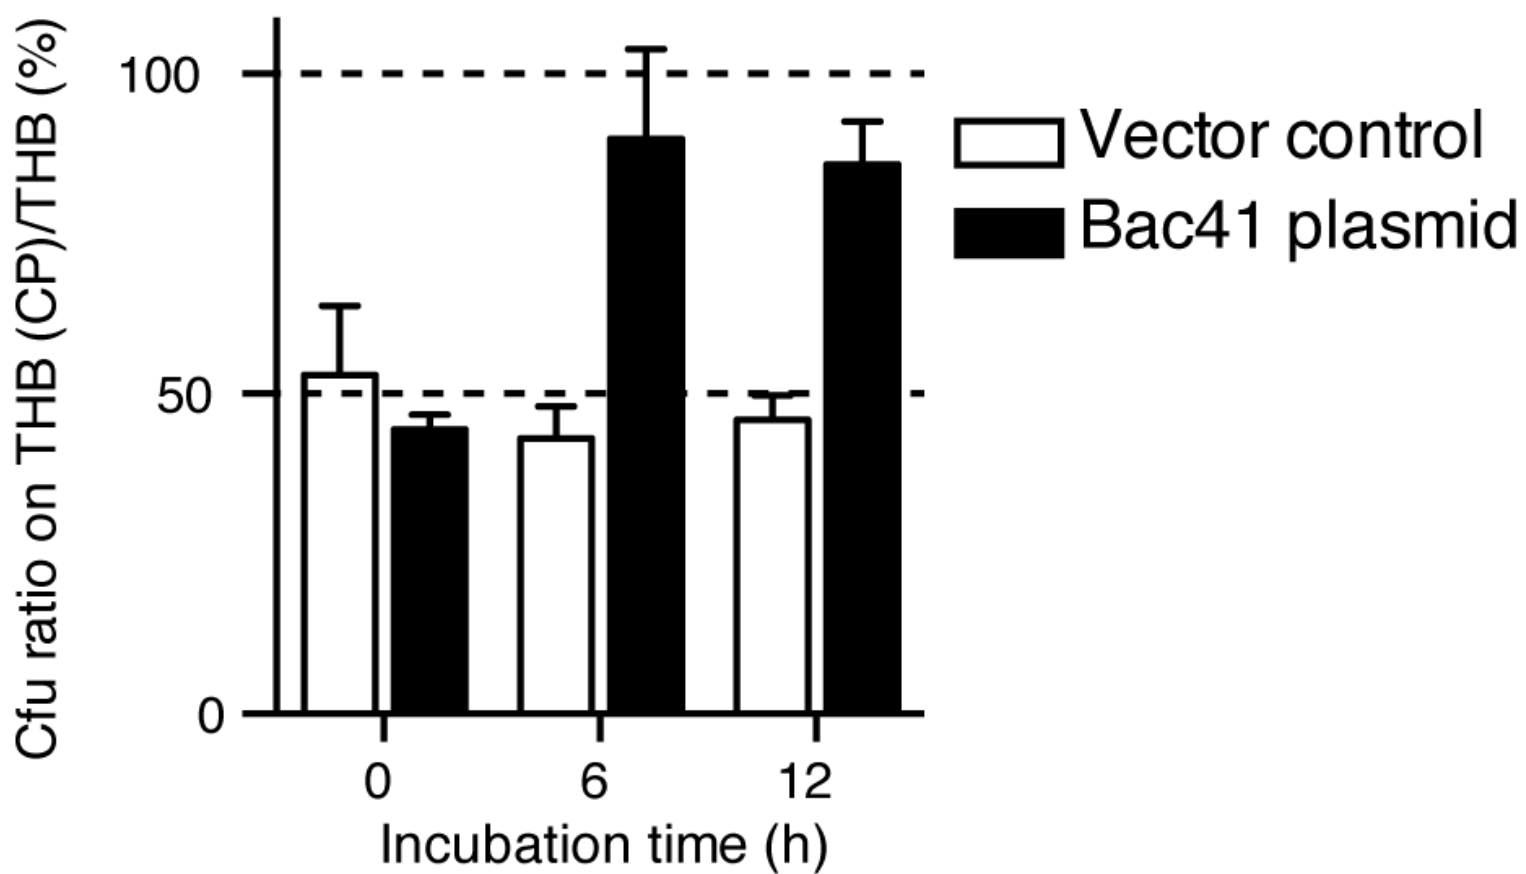

# Figure S2

## A BacL<sub>1</sub>

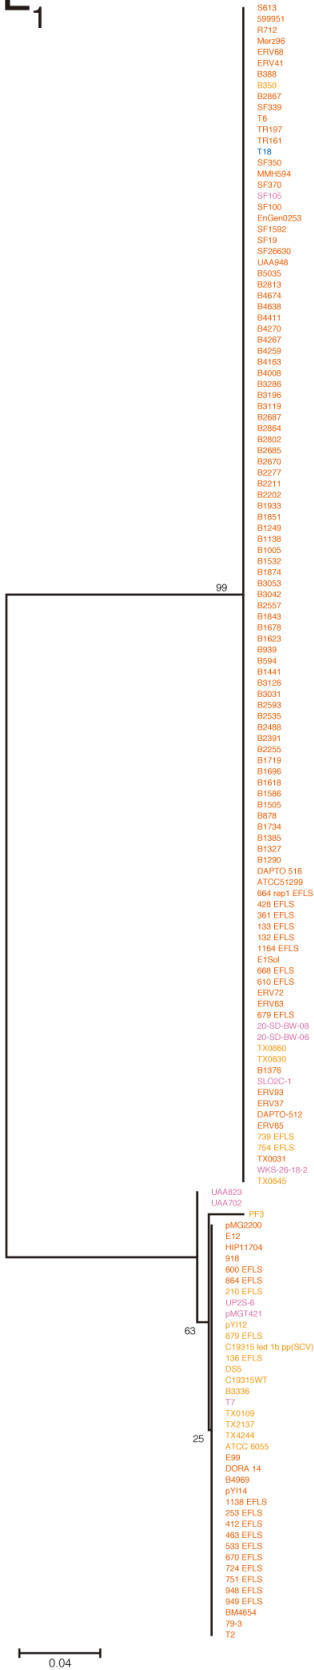

## B BacL<sub>2</sub>

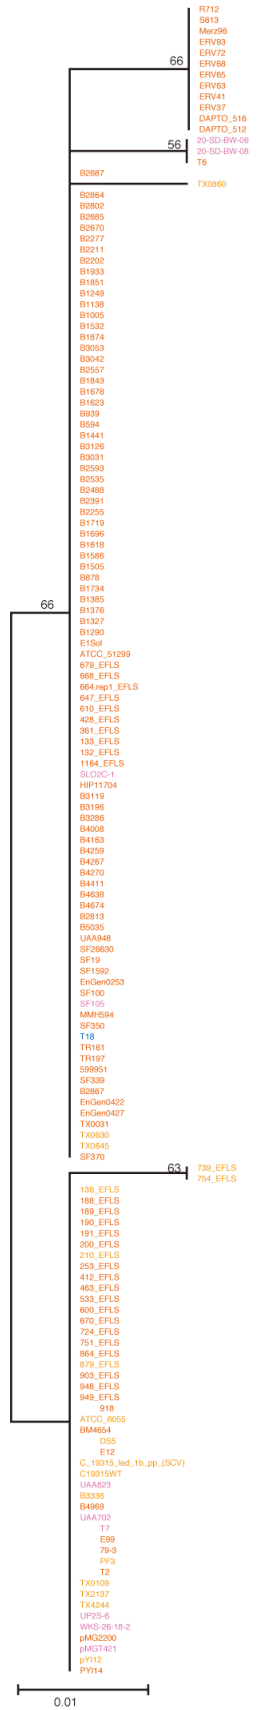

# Figure S3

## BacA

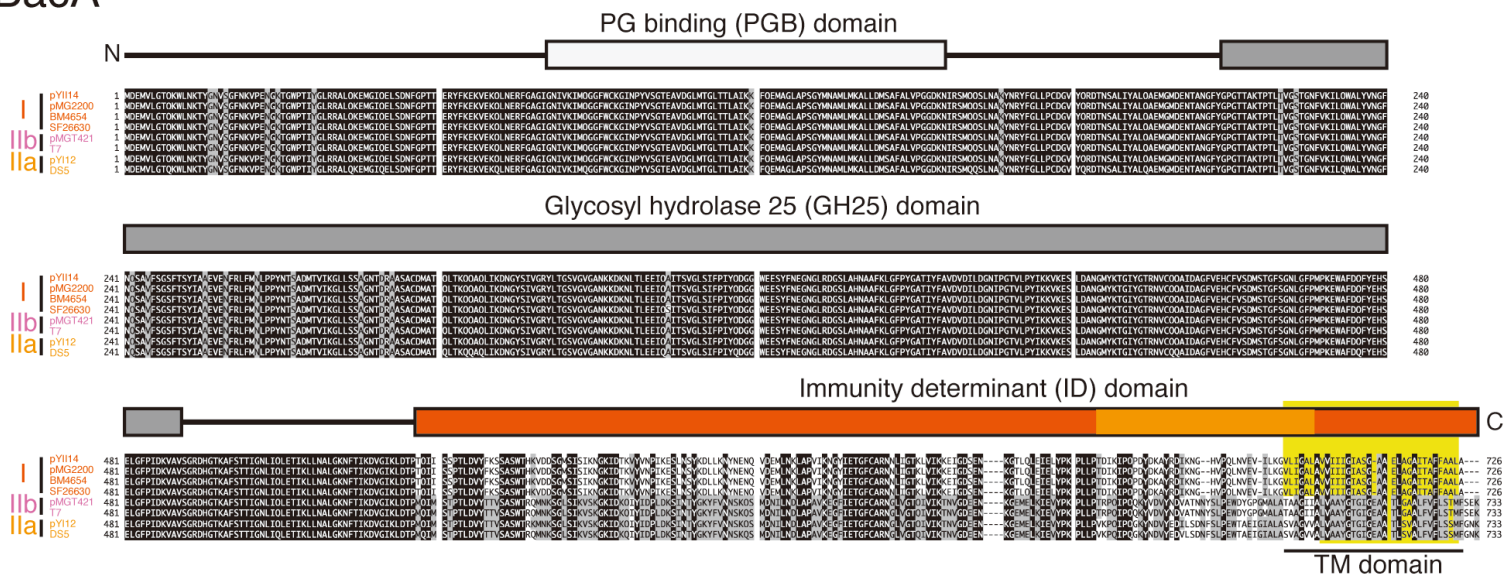

# Figure S4

## A BacI1

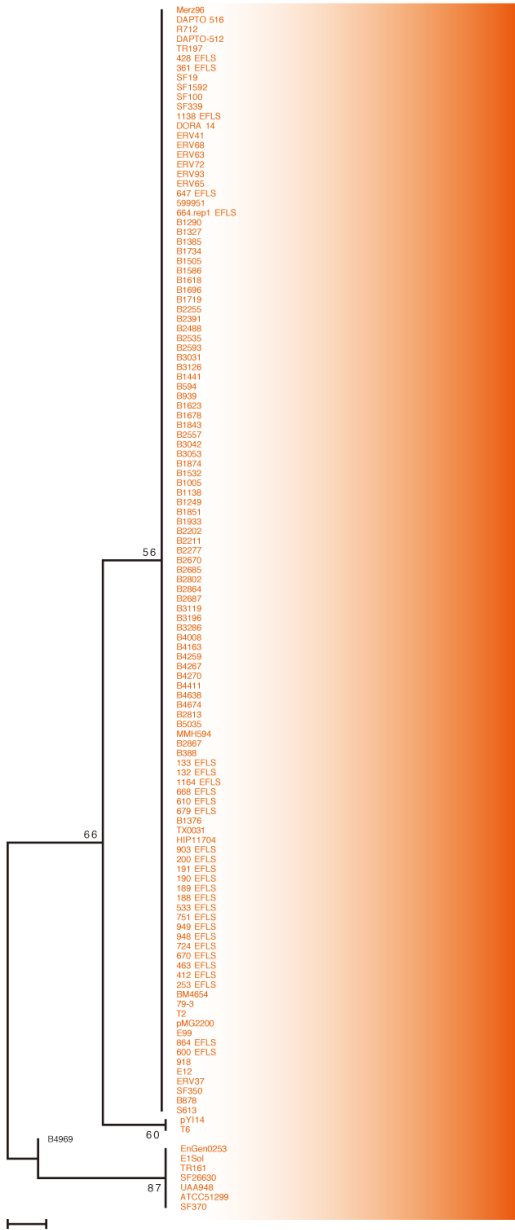

Type I  
Immunity

## B BacI2

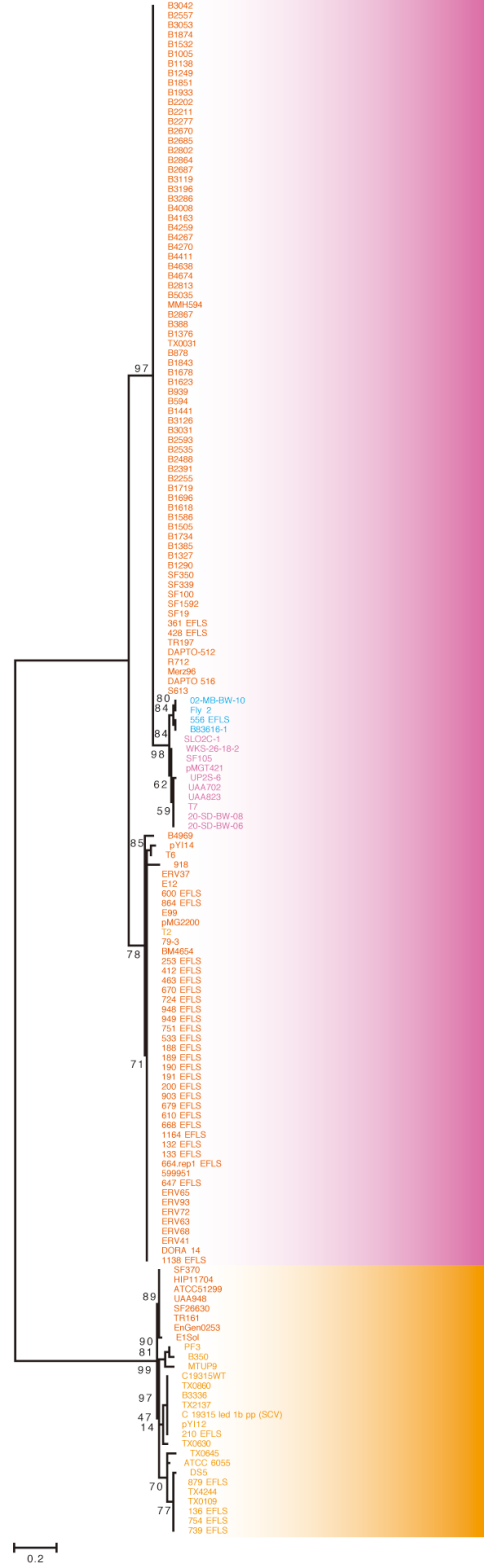

Type IIb  
Immunity

Type IIa  
Immunity

Figure S5

**A BacI1**

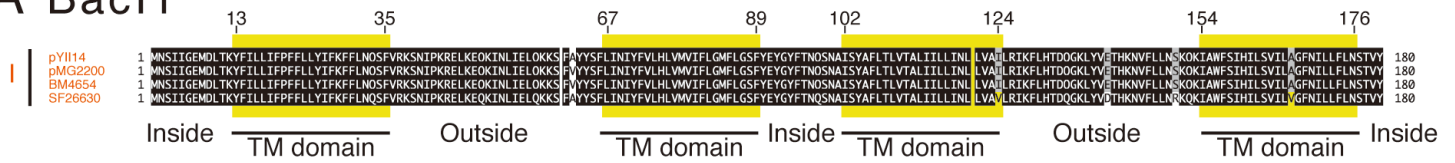

**B BacI2**

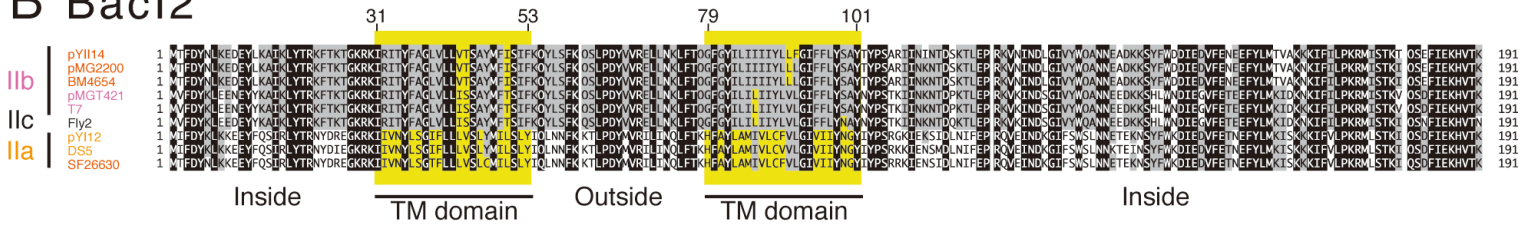

Supplement: JB.00348-16_zjb999094159so1.pdf [file JB.00348-16_zjb999094159so1.pdf]
