# Supplementary material
Source: PubMed Central journal article supplement (PMC4984558)
Supplement: JB.00348-16_zjb999094159so3.pdf [file JB.00348-16_zjb999094159so3.pdf]

Table S1. Epidemiological information, genotype, bacteriocin activity and antimicrobial susceptibility in the enterococci collection.

| Category | Source      |      |       | Specimen  | Gender              | Age     | PCR                            |                         |                         |           |       | MIC  |      |       |      |      |      |     |      |      |      |     |
|----------|-------------|------|-------|-----------|---------------------|---------|--------------------------------|-------------------------|-------------------------|-----------|-------|------|------|-------|------|------|------|-----|------|------|------|-----|
|          | ID          | Year | Place |           |                     |         | <i>ddlE<sub>faecalis</sub></i> | <i>bacL<sub>1</sub></i> | <i>bacL<sub>2</sub></i> | Anti-OG1S | Bac41 | ABPC | MINO | VCM   | EM   | CM   | CPFX | GM  | KM   | SM   | TC   |     |
| 1        | Kiryu201403 | 1    | 2014  | Gunma     | Urine               | F       | 25                             | +                       | +                       | +         | +     | +    | 16   | ≤32   | ≤8   | >256 | ≤32  | ≤32 | ≤256 | ≤256 | ≤256 | ≤32 |
| 2        | Kiryu201403 | 2    | 2014  | Gunma     | Vascular catheter   | F       | 75                             | +                       | +                       | +         | +     | +    | 16   | ≤32   | ≤8   | >256 | ≤32  | ≤32 | ≤256 | ≤256 | ≤256 | 64  |
| 3        | Kiryu201403 | 3    | 2014  | Gunma     | Blood               | M       | 76                             | -                       | -                       | -         | -     | -    | -    | -     | -    | -    | -    | -   | -    | -    | -    | -   |
| 4        | Kiryu201403 | 4    | 2014  | Gunma     | Peritoneal drainage | F       | 74                             | +                       | -                       | -         | +     | -    | 16   | ≤32   | ≤8   | >256 | ≤32  | ≤32 | ≤256 | ≤256 | ≤256 | 64  |
| 5        | Kiryu201403 | 5    | 2014  | Gunma     | Urinary catheter    | F       | 46                             | +                       | -                       | -         | +     | -    | 8    | ≤32   | ≤8   | >256 | ≤32  | ≤32 | ≤256 | ≤256 | ≤256 | 64  |
| 6        | Kiryu201403 | 6    | 2014  | Gunma     | Vagina              | F       | 46                             | +                       | -                       | -         | +     | -    | 16   | ≤32   | ≤8   | >256 | ≤32  | ≤32 | ≤256 | ≤256 | ≤256 | 64  |
| 7        | Kiryu201403 | 7    | 2014  | Gunma     | Feces               | M       | 0                              | +                       | -                       | -         | -     | -    | 16   | ≤32   | ≤8   | >256 | ≤32  | ≤32 | ≤256 | ≤256 | ≤256 | 64  |
| 8        | Kiryu201403 | 8    | 2014  | Gunma     | Urinary catheter    | F       | 91                             | +                       | -                       | -         | +     | -    | 16   | ≤32   | ≤8   | >256 | ≤32  | ≤32 | ≤256 | >256 | >256 | 64  |
| 9        | Kiryu201403 | 9    | 2014  | Gunma     | Pus                 | F       | 89                             | -                       | -                       | -         | -     | -    | -    | -     | -    | -    | -    | -   | -    | -    | -    | -   |
| 10       | Kiryu201403 | 10   | 2014  | Gunma     | Vagina              | F       | 62                             | +                       | +                       | +         | +     | +    | 16   | ≤32   | ≤8   | >256 | ≤32  | ≤32 | ≤256 | ≤256 | ≤256 | 64  |
| 11       | Kiryu201403 | 11   | 2014  | Gunma     | Feces               | M       | 0                              | -                       | -                       | -         | -     | -    | -    | -     | -    | -    | -    | -   | -    | -    | -    | -   |
| 12       | Kiryu201403 | 12   | 2014  | Gunma     | Urinary catheter    | F       | 87                             | +                       | -                       | -         | +     | -    | 8    | ≤32   | ≤8   | >256 | ≤32  | ≤32 | >256 | >256 | ≤256 | 64  |
| 13       | Kiryu201403 | 13   | 2014  | Gunma     | Blood               | M       | 76                             | -                       | -                       | -         | -     | -    | -    | -     | -    | -    | -    | -   | -    | -    | -    | -   |
| 14       | Kiryu201403 | 14   | 2014  | Gunma     | Urinary catheter    | M       | 76                             | +                       | +                       | -         | -     | -    | 16   | ≤32   | ≤8   | >256 | ≤32  | ≤32 | ≤256 | ≤256 | ≤256 | ≤32 |
| 15       | Kiryu201403 | 15   | 2014  | Gunma     | Bile                | M       | 76                             | -                       | -                       | -         | -     | -    | -    | -     | -    | -    | -    | -   | -    | -    | -    | -   |
| 16       | Kiryu201403 | 16   | 2014  | Gunma     | Blood               | F       | 77                             | +                       | +                       | -         | +     | -    | 16   | ≤32   | ≤8   | >256 | ≤32  | ≤32 | ≤256 | ≤256 | ≤256 | 64  |
| 17       | Kiryu201403 | 17   | 2014  | Gunma     | Urine               | M       | 81                             | -                       | -                       | -         | +     | -    | -    | -     | -    | -    | -    | -   | -    | -    | -    | -   |
| 18       | Kiryu201403 | 18   | 2014  | Gunma     | Vagina              | F       | 53                             | +                       | -                       | +         | +     | -    | 16   | ≤32   | ≤8   | >256 | ≤32  | ≤32 | ≤256 | >256 | ≤256 | 64  |
| 19       | Kiryu201403 | 19   | 2014  | Gunma     | Urinary catheter    | F       | 91                             | -                       | -                       | -         | -     | -    | -    | -     | -    | -    | -    | -   | -    | -    | -    | -   |
| 20       | Kiryu201403 | 20   | 2014  | Gunma     | Sputum              | M       | 76                             | +                       | +                       | +         | +     | +    | 16   | ≤32   | ≤8   | >256 | ≤32  | ≤32 | ≤256 | ≤256 | ≤256 | 64  |
| 21       | Kiryu201403 | 21   | 2014  | Gunma     | Urinary catheter    | M       | 70                             | +                       | +                       | +         | +     | +    | 16   | ≤32   | ≤8   | >256 | ≤32  | ≤32 | ≤256 | >256 | ≤256 | 64  |
| 22       | Kiryu201403 | 22   | 2014  | Gunma     | Sputum              | F       | 0                              | +                       | +                       | +         | +     | +    | 16   | ≤32   | ≤8   | >256 | ≤32  | ≤32 | ≤256 | >256 | ≤256 | 64  |
| 23       | Kiryu201403 | 23   | 2014  | Gunma     | Sputum              | F       | 84                             | +                       | -                       | -         | -     | -    | 8    | ≤32   | ≤8   | >256 | ≤32  | ≤32 | ≤256 | ≤256 | ≤256 | ≤32 |
| 24       | Kiryu201403 | 24   | 2014  | Gunma     | Sputum              | F       | 77                             | +                       | +                       | +         | +     | +    | 16   | ≤32   | ≤8   | >256 | ≤32  | ≤32 | ≤256 | ≤256 | ≤256 | 64  |
| 25       | Kiryu201403 | 25   | 2014  | Gunma     | Urinary catheter    | F       | 89                             | -                       | -                       | -         | -     | -    | -    | -     | -    | -    | -    | -   | -    | -    | -    | -   |
| 26       | Kiryu201403 | 26   | 2014  | Gunma     | Ascites             | M       | 85                             | +                       | -                       | -         | -     | -    | 8    | ≤32   | ≤8   | >256 | ≤32  | ≤32 | ≤256 | ≤256 | ≤256 | ≤32 |
| 27       | Kiryu201403 | 27   | 2014  | Gunma     | Vagina              | F       | 69                             | +                       | +                       | +         | +     | +    | 8    | ≤32   | ≤8   | >256 | >32  | ≤32 | ≤256 | ≤256 | >256 | 64  |
| 28       | Kiryu201403 | 28   | 2014  | Gunma     | Nasopharynx         | F       | 0                              | +                       | -                       | -         | -     | -    | 8    | ≤32   | ≤8   | >256 | ≤32  | ≤32 | ≤256 | ≤256 | ≤256 | 64  |
| 29       | Kiryu201403 | 29   | 2014  | Gunma     | Pus                 | F       | 49                             | -                       | -                       | -         | -     | -    | -    | -     | -    | -    | -    | -   | -    | -    | -    | -   |
| 30       | Kiryu201403 | 30   | 2014  | Gunma     | Bile                | M       | 84                             | -                       | -                       | -         | -     | -    | -    | -     | -    | -    | -    | -   | -    | -    | -    | -   |
| 31       | ML2012VRE   | 1    | 2012  | Tokyo     | Blood               | M       | 85                             | -                       | -                       | -         | -     | -    | 0.5  | 16    | 8    | 0.25 | 4    | 2   | 16   | 32   | 32   |     |
| 32       | ML2012VRE   | 3    | 2012  | Hokkaido  | Unknown             | M       | 46                             | -                       | -                       | -         | -     | -    | 0.5  | 0.125 | 4    | 0.25 | 4    | 2   | 16   | 32   | 32   |     |
| 33       | ML2012VRE   | 4    | 2012  | Gunma     | Blood               | M       | 87                             | -                       | -                       | -         | -     | -    | 0.5  | 0.125 | 4    | 1    | 4    | 2   | 16   | 32   | 32   |     |
| 34       | ML2012VRE   | 5    | 2012  | Saitama   | Unknown             | Unknown | Unknown                        | -                       | -                       | -         | -     | -    | 0.5  | 16    | 4    | 2    | 4    | 1   | 16   | 32   | 32   |     |
| 35       | ML2012VRE   | 6    | 2012  | Kumamoto  | Blood               | M       | 66                             | -                       | -                       | -         | -     | -    | 0.5  | 0.125 | 4    | 0.5  | 4    | 1   | 16   | 32   | 32   |     |
| 36       | ML2012VRE   | 7    | 2012  | Osaka     | Unknown             | Unknown | 87                             | -                       | -                       | -         | -     | -    | 0.5  | 0.125 | 8    | 0.25 | 4    | 4   | 16   | 32   | 32   |     |
| 37       | ML2012VRE   | 8    | 2012  | Saitama   | Unknown             | Unknown | Unknown                        | -                       | -                       | -         | -     | -    | 0.5  | 0.125 | 4    | 2    | 4    | 2   | 16   | 32   | 32   |     |
| 38       | ML2012VRE   | 11   | 2012  | Fukuoka   | Feces               | M       | 71                             | -                       | -                       | -         | +     | -    | 128  | 4     | 4    | >128 | 4    | 64  | >256 | >256 | 32   |     |
| 39       | ML2012VRE   | 12   | 2012  | Kumamoto  | Blood               | F       | 82                             | -                       | -                       | -         | -     | -    | 0.5  | 0.125 | 4    | 2    | 4    | 2   | 16   | 32   | 32   |     |
| 40       | ML2012VRE   | 13   | 2012  | Kumamoto  | Blood               | F       | 88                             | -                       | -                       | -         | -     | -    | 0.5  | 0.125 | 4    | 2    | 4    | 0.5 | 16   | 32   | 32   |     |
| 41       | ML2012VRE   | 14   | 2012  | Fukuoka   | Unknown             | F       | 75                             | -                       | -                       | -         | -     | -    | 0.5  | 0.125 | 4    | 0.25 | 4    | 1   | 16   | 32   | 32   |     |
| 42       | ML2012VRE   | 15   | 2012  | Niigata   | Unknown             | F       | 85                             | -                       | -                       | -         | -     | -    | 0.5  | 0.125 | 4    | 0.25 | 4    | 2   | 16   | 32   | 32   |     |
| 43       | ML2012VRE   | 24   | 2012  | Fukuoka   | Bile                | F       | 79                             | -                       | -                       | -         | -     | -    | 0.5  | 0.125 | 4    | 0.25 | 4    | 4   | 16   | 32   | 32   |     |
| 44       | ML2012VRE   | 29   | 2012  | Kumamoto  | Blood               | M       | 89                             | -                       | -                       | -         | -     | -    | 0.5  | 0.125 | 4    | 0.25 | 4    | 1   | 16   | 32   | 32   |     |
| 45       | ML2012VRE   | 30   | 2012  | Fukuoka   | Ascites             | F       | 79                             | -                       | -                       | -         | -     | -    | 1    | 8     | 4    | >128 | 4    | 2   | 16   | 32   | 32   |     |
| 46       | ML2012VRE   | 33   | 2012  | Fukuoka   | Blood               | M       | Unknown                        | -                       | -                       | -         | -     | -    | 0.5  | 0.125 | 4    | 2    | 4    | 1   | 16   | 32   | 32   |     |
| 47       | ML2012VRE   | 34   | 2012  | Okayama   | Blood               | M       | 70                             | -                       | -                       | -         | -     | -    | 0.5  | 0.125 | 4    | 0.5  | 4    | 1   | 16   | 32   | 32   |     |
| 48       | ML2012VRE   | 35   | 2012  | Osaka     | Nasopharynx         | Unknown | 0                              | -                       | -                       | -         | -     | -    | 1    | 0.125 | 4    | 1    | 4    | 2   | 16   | 64   | 32   |     |
| 49       | ML2012VRE   | 36   | 2012  | Fukuoka   | Pus                 | F       | 74                             | -                       | -                       | -         | -     | -    | 1    | 0.125 | 4    | 0.25 | 4    | 0.5 | 16   | 32   | 32   |     |
| 50       | ML2012VRE   | 38   | 2012  | Chiba     | Blood               | M       | 71                             | -                       | -                       | -         | -     | -    | 0.5  | 0.125 | 4    | 2    | 4    | 2   | 16   | 64   | 32   |     |
| 51       | ML2012VRE   | 40   | 2012  | Fukuoka   | Pus                 | M       | 67                             | -                       | -                       | -         | -     | -    | 0.5  | 0.125 | 4    | >128 | 4    | 2   | 16   | 32   | 32   |     |
| 52       | ML2012VRE   | 41   | 2012  | Kumamoto  | Unknown             | M       | 77                             | -                       | -                       | -         | -     | -    | 0.5  | 0.125 | 4    | 1    | 4    | 0.5 | >256 | >256 | 32   |     |
| 53       | ML2012VRE   | 42   | 2012  | Aichi     | Blood               | M       | 93                             | -                       | -                       | -         | -     | -    | 0.5  | 0.125 | 4    | 2    | 4    | 2   | 16   | 32   | 32   |     |
| 54       | ML2012VRE   | 43   | 2012  | Kanagawa  | Blood               | M       | 80                             | -                       | -                       | -         | -     | -    | 0.5  | 0.125 | 4    | 0.25 | 4    | 1   | 16   | 32   | 32   |     |
| 55       | ML2012VRE   | 44   | 2012  | Fukuoka   | Feces               | M       | 69                             | -                       | -                       | -         | -     | -    | 32   | 0.125 | 1    | >128 | 4    | 32  | 16   | >256 | 32   |     |
| 56       | ML2012VRE   | 45   | 2012  | Fukuoka   | Bile                | M       | 62                             | -                       | -                       | -         | -     | -    | 0.5  | 0.125 | 4    | 1    | 4    | 1   | 16   | 32   | 32   |     |
| 57       | ML2012VRE   | 46   | 2012  | Fukuoka   | Feces               | F       | 87                             | -                       | -                       | -         | +     | -    | 128  | 0.125 | 32   | >128 | 4    | 32  | 16   | >256 | 32   |     |
| 58       | ML2012VRE   | 49   | 2012  | Chiba     | Blood               | M       | 75                             | -                       | -                       | -         | -     | -    | 0.5  | 0.125 | 4    | 4    | 4    | 2   | 16   | 32   | 32   |     |
| 59       | ML2012VRE   | 50   | 2012  | Fukuoka   | Bile                | F       | 89                             | -                       | -                       | -         | -     | -    | 0.5  | 0.125 | 4    | 1    | 4    | 8   | 16   | 64   | 32   |     |
| 60       | ML2012VRE   | 51   | 2012  | Fukuoka   | Bile                | M       | 91                             | -                       | -                       | -         | -     | -    | 0.5  | 0.125 | 4    | 1    | 4    | 1   | 16   | 32   | 32   |     |
| 61       | ML2012VRE   | 52   | 2012  | Unknown   | Unknown             | Unknown | Unknown                        | -                       | -                       | -         | -     | -    | 128  | 8     | 16   | >128 | 16   | 8   | >256 | >256 | 256  |     |
| 62       | ML2012VRE   | 55   | 2012  | Yamanashi | Unknown             | F       | 97                             | -                       | -                       | -         | -     | -    | 64   | 32    | 32   | >128 | 4    | 16  | 16   | >256 | >256 |     |
| 63       | ML2012VRE   | 56   | 2012  | Tokyo     | Unknown             | M       | 80                             | -                       | -                       | -         | -     | -    | 128  | 8     | >128 | 2    | 4    | 64  | 16   | 32   | 32   |     |
| 64       | ML2012VRE   | 58   | 2012  | Yamanashi | Unknown             | F       | 91                             | -                       | -                       | -         | -     | -    | 32   | 8     | 16   | >128 | 4    | 32  | 16   | >256 | >256 |     |
| 65       | ML2012VRE   | 59   | 2012  | Fukuoka   | Unknown             | F       | Unknown                        | -                       | -                       | -         | -     | -    | >128 | 8     | >128 | >128 | 8    | 64  | 16   | >256 | 32   |     |
| 66       | ML2012VRE   | 60   | 2012  | Fukuoka   | Unknown             | M       | 61                             | -                       | -                       | -         | +     | -    | >128 | 0.125 | >128 | >128 | 8    | 128 | 16   | 32   | 32   |     |
| 67       | ML2012VRE   | 61   | 2012  | Kyoto     | Feces               | M       | 76                             | -                       | -                       | -         | +     | -    | >128 | 0.125 | >128 | >128 | 8    | 64  | >256 | >256 | >256 |     |
| 68       | ML2012VRE   | 62   | 2012  | Gunma     | Unknown             | F       | 57                             | +                       | -                       | -         | -     | -    | 2    | 32    | 16   | >128 | 8    | 32  | 16   | >256 | >256 | 32  |
| 69       | ML2012VRE   | 63   | 2012  | Fukuoka   | Pus                 | F       | 65                             | -                       | -                       | -         | -     | -    | >128 | 4     | >128 | >128 | 8    | 64  | 16   | >256 | 32   |     |
| 70       | ML2012VRE   | 64   | 2012  | Fukuoka   | Feces               | M       | 58                             | -                       | -                       | -         | +     | -    | >128 | 1     | 4    | >128 | 4    | 32  | 16   | >256 | 32   |     |
| 71       | ML2012VRE   | 65   | 2012  | Tokyo     | Feces               | M       | Unknown                        | -                       | -                       | -         | -     | -    | 0.5  | 0.125 | 0.5  | 0.25 | 4    | 0.5 | 16   | 32   | 32   |     |
| 72       | ML2012VRE   | 66   | 2012  | Tokyo     | Feces               | F       | Unknown                        | +                       | +                       | +         | +     | +    | 2    | 32    | 32   | >128 | 8    | 32  | 16   | >256 | >256 | 32  |
| 73       | ML2012VRE   | 67   | 2012  | Fukuoka   | Feces               | M       | 67                             | +                       | +                       | +         | +     | +    | 2    | 32    | 32   | >128 | 8    | 32  | 16   | >256 | >256 | 32  |
| 74       | ML2012VRE   | 68   | 2012  | Fukuoka   | Sputum              | M       | 82                             | -                       | -                       | -         | +     | -    | 128  | 4     | 8    | >128 | 8    | 32  | >256 | >256 | 32   |     |
| 75       | ML2012VRE   | 69   | 2012  | Fukuoka</ |                     |         |                                |                         |                         |           |       |      |      |       |      |      |      |     |      |      |      |     |

|     |           |    |      |           |                  |         |         |   |   |   |   |   |     |       |    |      |    |     |      |      |      |     |
|-----|-----------|----|------|-----------|------------------|---------|---------|---|---|---|---|---|-----|-------|----|------|----|-----|------|------|------|-----|
| 87  | ML2012VRE | 81 | 2012 | Tokyo     | Unknown          | M       | 74      | + | + | + | + | + | 1   | 32    | 32 | >128 | 64 | 64  | 16   | >256 | >256 | 64  |
| 88  | ML2012VRE | 82 | 2012 | Gunma     | Ascites          | M       | 79      | - | - | - | - | - | 0.5 | 0.125 | 4  | 2    | 4  | 2   | 16   | 32   | 32   |     |
| 89  | ML2012VRE | 83 | 2012 | Fukuoka   | Feces            | M       | 68      | - | - | - | - | - | 0.5 | 0.125 | 4  | 2    | 4  | 1   | 16   | 32   | 32   |     |
| 90  | ML2012VRE | 84 | 2012 | Tokyo     | Urinary catheter | Unknown | Unknown | + | + | + | + | + | 1   | 32    | 64 | >128 | 32 | 32  | >256 | >256 | 64   | 64  |
| 91  | ML2012Efs | 1  | 2012 | Toyama    | Eye              | F       | 78      | + | + | + | + | + | 1   | 32    | 4  | 2    | 8  | 2   | 16   | 32   | 64   | 64  |
| 92  | ML2012Efs | 2  | 2012 | Nagano    | Vagina           | F       | 33      | + | - | - | + | - | 1   | 32    | 2  | >128 | 8  | 2   | 32   | >256 | >256 | 64  |
| 93  | ML2012Efs | 3  | 2012 | Aichi     | Urine            | F       | 30      | + | + | + | + | + | 1   | 32    | 1  | >128 | 8  | 1   | 16   | 32   | 32   | 64  |
| 94  | ML2012Efs | 4  | 2012 | Okayama   | Sputum           | M       | 82      | + | - | - | - | - | 1   | 0.125 | 4  | 0.5  | 8  | 2   | 16   | 32   | 64   | 0.5 |
| 95  | ML2012Efs | 5  | 2012 | Shizuoka  | Skin             | M       | 0       | + | - | - | + | - | 1   | 32    | 2  | >128 | 8  | 2   | >256 | >256 | >256 | 64  |
| 96  | ML2012Efs | 6  | 2012 | Tochigi   | Urine            | M       | 86      | + | + | + | + | + | 2   | 32    | 2  | 0.5  | 8  | 1   | 16   | 32   | 64   | 64  |
| 97  | ML2012Efs | 7  | 2012 | Tokyo     | Urine            | F       | 40      | + | - | - | - | - | 1   | 32    | 4  | 0.5  | 8  | 2   | 16   | 32   | 64   | 64  |
| 98  | ML2012Efs | 8  | 2012 | Shizuoka  | Urine            | F       | 0       | + | + | + | + | + | 2   | 32    | 1  | >128 | 8  | 1   | 16   | 32   | 32   | 64  |
| 99  | ML2012Efs | 9  | 2012 | Aomori    | Decubitus        | M       | 78      | + | + | + | + | + | 1   | 32    | 1  | >128 | 8  | 2   | >256 | >256 | 64   | 64  |
| 100 | ML2012Efs | 10 | 2012 | Nagano    | Skin             | M       | 0       | + | + | + | + | + | 1   | 32    | 1  | >128 | 8  | 2   | 16   | 32   | 64   | 64  |
| 101 | ML2012Efs | 11 | 2012 | Nagano    | Urine            | F       | 76      | + | + | - | - | - | 1   | 32    | 2  | >128 | 8  | 2   | >256 | >256 | 32   | 128 |
| 102 | ML2012Efs | 12 | 2012 | Tochigi   | Vagina           | F       | 83      | + | + | + | + | + | 2   | 32    | 2  | >128 | 8  | 1   | 16   | 32   | 64   | 64  |
| 103 | ML2012Efs | 13 | 2012 | Chiba     | Urine            | M       | 87      | + | + | + | + | + | 1   | 32    | 2  | >128 | 8  | 1   | >256 | >256 | 64   | 64  |
| 104 | ML2012Efs | 14 | 2012 | Aichi     | Urine            | F       | 82      | + | + | + | + | + | 1   | 32    | 2  | >128 | 8  | 64  | >256 | >256 | 64   | 64  |
| 105 | ML2012Efs | 15 | 2012 | Nagano    | Urine            | F       | 84      | + | + | + | + | + | 1   | 32    | 1  | >128 | 8  | 1   | 16   | 32   | 64   | 64  |
| 106 | ML2012Efs | 16 | 2012 | Chiba     | Urine            | F       | 35      | + | - | - | + | - | 1   | 32    | 2  | >128 | 8  | 64  | 16   | 64   | 64   | 64  |
| 107 | ML2012Efs | 17 | 2012 | Ibaraki   | Sputum           | F       | 80      | + | - | - | - | - | 1   | 16    | 4  | 0.25 | 8  | 2   | 16   | 64   | 64   | 64  |
| 108 | ML2012Efs | 18 | 2012 | Chiba     | Blood            | M       | 84      | - | - | - | + | - | 2   | 32    | 2  | >128 | 8  | 1   | >256 | >256 | 64   | 64  |
| 109 | ML2012Efs | 19 | 2012 | Tokyo     | Bile             | M       | 87      | + | - | - | - | - | 0.5 | 0.125 | 2  | 0.25 | 4  | 1   | 16   | 32   | 32   | 0.5 |
| 110 | ML2012Efs | 20 | 2012 | Tokyo     | Urine            | F       | 33      | + | + | + | + | + | 1   | 32    | 1  | >128 | 8  | 1   | 16   | >256 | 32   | 64  |
| 111 | ML2012Efs | 21 | 2012 | Chiba     | Urine            | M       | 47      | + | + | + | + | + | 1   | 0.25  | 2  | 2    | 4  | 1   | >256 | >256 | 32   | 1   |
| 112 | ML2012Efs | 22 | 2012 | Aichi     | Urine            | F       | 46      | + | + | + | + | + | 1   | 32    | 2  | >128 | 8  | 1   | >256 | >256 | 64   | 64  |
| 113 | ML2012Efs | 23 | 2012 | Chiba     | Blood            | M       | 79      | + | + | + | - | - | 2   | 0.25  | 4  | >128 | 8  | 32  | 16   | 64   | 64   | 1   |
| 114 | ML2012Efs | 24 | 2012 | Yamagata  | Urine            | F       | 84      | + | + | + | + | + | 1   | 0.125 | 2  | >128 | 8  | 64  | 16   | >256 | >256 | 0.5 |
| 115 | ML2012Efs | 25 | 2012 | Chiba     | Urine            | F       | 67      | + | - | - | - | - | 0.5 | 0.25  | 1  | 2    | 4  | 1   | 16   | 64   | 64   | 1   |
| 116 | ML2012Efs | 26 | 2012 | Ishikawa  | Urine            | F       | 67      | + | + | + | + | + | 0.5 | 0.125 | 2  | 1    | 4  | 1   | 16   | 32   | 32   | 1   |
| 117 | ML2012Efs | 27 | 2012 | Ishikawa  | Urine            | F       | 83      | + | + | + | + | + | 1   | 32    | 2  | >128 | 8  | 1   | 16   | 32   | 64   | 64  |
| 118 | ML2012Efs | 28 | 2012 | Chiba     | Urine            | M       | 59      | + | - | - | + | - | 1   | 0.25  | 2  | >128 | 8  | 1   | 16   | 32   | 32   | 1   |
| 119 | ML2012Efs | 29 | 2012 | Ishikawa  | Urine            | M       | 79      | + | + | + | - | - | 2   | 4     | 4  | >128 | 8  | 32  | 16   | >256 | >256 | 16  |
| 120 | ML2012Efs | 30 | 2012 | Aichi     | Urine            | F       | 89      | + | + | + | + | + | 2   | 8     | 4  | >128 | 8  | 64  | 16   | >256 | >256 | 16  |
| 121 | ML2012Efs | 31 | 2012 | Aichi     | Urine            | F       | 62      | + | + | + | + | + | 1   | 32    | 2  | >128 | 8  | 1   | >256 | >256 | 64   | 64  |
| 122 | ML2012Efs | 32 | 2012 | Yamanashi | Urine            | F       | 80      | + | + | + | + | + | 1   | 32    | 2  | >128 | 8  | 1   | >256 | >256 | 64   | 64  |
| 123 | ML2012Efs | 33 | 2012 | Chiba     | Urine            | M       | 79      | + | + | + | + | + | 1   | 32    | 2  | >128 | 32 | 1   | >256 | >256 | 64   | 64  |
| 124 | ML2012Efs | 34 | 2012 | Tochigi   | Urine            | F       | 91      | + | - | - | - | - | 1   | 0.25  | 2  | 1    | 4  | 1   | 16   | 32   | 64   | 1   |
| 125 | ML2012Efs | 35 | 2012 | Tochigi   | Earwax           | M       | 42      | + | + | + | + | + | 1   | 0.25  | 2  | 2    | 8  | 1   | >256 | >256 | 64   | 1   |
| 126 | ML2012Efs | 36 | 2012 | Toyama    | Urine            | F       | 86      | + | - | - | - | - | 1   | 0.25  | 2  | 0.5  | 8  | 1   | 16   | 32   | 64   | 1   |
| 127 | ML2012Efs | 37 | 2012 | Ishikawa  | Vagina           | M       | 54      | + | + | + | + | + | 1   | 32    | 1  | >128 | 8  | 2   | 128  | >256 | 64   | 64  |
| 128 | ML2012Efs | 38 | 2012 | Gunma     | Sputum           | F       | 89      | + | + | + | + | + | 1   | 32    | 2  | >128 | 8  | 2   | 128  | >256 | 32   | 64  |
| 129 | ML2012Efs | 39 | 2012 | Nagano    | Urine            | M       | 87      | + | + | + | - | - | 1   | 64    | 2  | >128 | 8  | 2   | >256 | >256 | 64   | 256 |
| 130 | ML2012Efs | 40 | 2012 | Nagano    | Urine            | M       | 88      | + | + | + | + | + | 1   | 32    | 2  | >128 | 4  | 1   | >256 | >256 | 64   | 64  |
| 131 | ML2012Efs | 41 | 2012 | Chiba     | Pus              | M       | 71      | + | - | - | - | - | 2   | 4     | 4  | >128 | 8  | 64  | 16   | >256 | >256 | 1   |
| 132 | ML2012Efs | 42 | 2012 | Chiba     | Decubitus        | M       | 55      | + | + | + | + | + | 1   | 32    | 2  | >128 | 4  | 1   | 256  | >256 | 64   | 256 |
| 133 | ML2012Efs | 43 | 2012 | Wakayama  | Urine            | M       | 81      | + | - | - | - | - | 1   | 32    | 4  | 2    | 4  | 2   | 16   | 32   | 64   | 64  |
| 134 | ML2012Efs | 44 | 2012 | Wakayama  | Decubitus        | F       | 93      | - | - | - | + | - | 1   | 0.25  | 2  | 2    | 4  | 1   | >256 | >256 | 64   | 1   |
| 135 | ML2012Efs | 45 | 2012 | Wakayama  | Urine            | M       | 74      | + | + | + | + | + | 1   | 32    | 2  | >128 | 4  | 1   | 64   | >256 | 32   | 64  |
| 136 | ML2012Efs | 46 | 2012 | Tokyo     | Urine            | M       | 34      | + | + | + | + | + | 1   | 32    | 1  | >128 | 4  | 0.5 | 256  | >256 | 32   | 64  |
| 137 | ML2012Efs | 47 | 2012 | Kanagawa  | Vagina           | F       | 83      | + | - | - | - | - | 1   | 64    | 2  | >128 | 64 | 64  | >256 | >256 | 32   | 256 |
| 138 | ML2012Efs | 48 | 2012 | Nagano    | Urine            | F       | 24      | + | + | + | + | + | 1   | 32    | 1  | >128 | 4  | 1   | 16   | 32   | 64   | 64  |
| 139 | ML2012Efs | 49 | 2012 | Kanagawa  | Urine            | M       | 42      | + | + | + | + | + | 1   | 32    | 1  | >128 | 8  | 1   | >256 | >256 | 64   | 64  |
| 140 | ML2012Efs | 50 | 2012 | Kanagawa  | Urine            | F       | 84      | + | + | + | + | + | 2   | 4     | 4  | >128 | 8  | 32  | >256 | >256 | >256 | 16  |
| 141 | ML2012Efs | 51 | 2012 | Aichi     | Urine            | F       | 48      | - | - | - | + | - | 1   | 32    | 2  | >128 | 8  | 1   | 256  | >256 | 64   | 64  |
| 142 | ML2012Efs | 52 | 2012 | Aichi     | Urine            | M       | 86      | + | - | - | + | - | 1   | 32    | 2  | 2    | 4  | 2   | 16   | 32   | 64   | 64  |
| 143 | ML2012Efs | 53 | 2012 | Gifu      | Decubitus        | F       | 76      | + | - | - | + | - | 1   | 32    | 1  | >128 | 8  | 2   | >256 | >256 | >256 | 64  |
| 144 | ML2012Efs | 54 | 2012 | Ishikawa  | Urine            | M       | 78      | + | + | + | + | + | 1   | 32    | 2  | >128 | 4  | 2   | 64   | >256 | 32   | 64  |
| 145 | ML2012Efs | 55 | 2012 | Chiba     | Urine            | M       | 86      | + | + | + | + | + | 1   | 0.25  | 2  | 2    | 4  | 1   | 128  | >256 | 32   | 1   |
| 146 | ML2012Efs | 56 | 2012 | Shizuoka  | Urine            | F       | 26      | + | + | + | + | + | 1   | 32    | 2  | >128 | 8  | 1   | 256  | >256 | 32   | 64  |
| 147 | ML2012Efs | 57 | 2012 | Tochigi   | Urine            | M       | 87      | + | - | - | + | - | 2   | 0.25  | 2  | 4    | 4  | 1   | >256 | >256 | 32   | 1   |
| 148 | ML2012Efs | 58 | 2012 | Tochigi   | Urine            | M       | 79      | + | + | + | + | + | 1   | 32    | 1  | >128 | 64 | 1   | 256  | >256 | 64   | 64  |
| 149 | ML2012Efs | 59 | 2012 | Tokyo     | Urine            | F       | 4       | + | - | + | + | - | 1   | 8     | 1  | >128 | 4  | 2   | 256  | >256 | 64   | 32  |
| 150 | ML2012Efs | 60 | 2012 | Tokyo     | Urine            | M       | 62      | + | + | + | + | + | 1   | 32    | 1  | >128 | 8  | 1   | 128  | >256 | 64   | 64  |
| 151 | ML2012Efs | 61 | 2012 | Chiba     | Urine            | F       | 85      | + | - | - | + | - | 2   | 0.25  | 2  | 1    | 8  | 2   | 16   | 64   | 64   | 1   |
| 152 | ML2012Efs | 62 | 2012 | Tokyo     | Blood            | F       | 67      | + | + | + | + | + | 1   | 32    | 1  | 2    | 8  | 2   | 16   | 128  | 128  | 64  |
| 153 | ML2012Efs | 63 | 2012 | Chiba     | Urine            | M       | 47      | + | - | + | - | - | 1   | 16    | 2  | >128 | 8  | 4   | 16   | >256 | >256 | 128 |
| 154 | ML2012Efs | 64 | 2012 | Shizuoka  | Vagina           | F       | 53      | + | + | + | + | + | 1   | 32    | 1  | >128 | 32 | 1   | 128  | >256 | 128  | 64  |
| 155 | ML2012Efs | 65 | 2012 | Tochigi   | Urine            | M       | 51      | + | + | + | + | + | 2   | 2     | 4  | >128 | 4  | 32  | >256 | >256 | >256 | 16  |
| 156 | ML2012Efs | 66 | 2012 | Chiba     | Urine            | M       | 70      | + | + | + | + | + | 1   | 32    | 1  | >128 | 8  | 1   | 128  | >256 | 64   | 64  |
| 157 | ML2012Efs | 67 | 2012 | Gunma     | Urine            | F       | 44      | + | - | + | - | - | 1   | 0.25  | 1  | 2    | 8  | 2   | 16   | 32   | 32   | 1   |
| 158 | ML2012Efs | 68 | 2012 | Tochigi   | Bile             | M       | 84      | + | + | + | + | + | 2   | 2     | 4  | >128 | 8  | 32  | 16   | >256 | >256 | 16  |
| 159 | ML2012Efs | 69 | 2012 | Chiba     | Pus              | M       | 72      | + | - | + | + | - | 1   | 16    | 1  | 1    | 4  | 1   | 16   | 32   | 64   | 64  |
| 160 | ML2012Efs | 70 | 2012 | Ishikawa  | Urine            | F       | 81      | + | + | + | + | + | 2   | 4     | 4  | >128 | 8  | 32  | 16   | >256 | >256 | 16  |
| 161 | ML2012Efs | 71 | 2012 | Ishikawa  | Urine            | M       | 63      | + | + | + | + | + | 1   | 32    | 1  | >128 | 32 | 1   | 16   | 64   | 128  | 64  |
| 162 | ML2012Efs | 72 | 2012 | Nagano    | Urine            | F       |         |   |   |   |   |   |     |       |    |      |    |     |      |      |      |     |

|     |           |    |      |           |                  |           |         |   |   |   |   |   |     |       |     |      |    |     |      |      |      |     |
|-----|-----------|----|------|-----------|------------------|-----------|---------|---|---|---|---|---|-----|-------|-----|------|----|-----|------|------|------|-----|
| 176 | ML2012EfS | 86 | 2012 | Fukushima | Urine            | M         | 69      | + | - | - | + | - | 2   | 64    | 4   | >128 | 8  | 32  | 256  | >256 | >256 | 32  |
| 177 | ML2012EfS | 87 | 2012 | Fukushima | Urine            | M         | 73      | + | + | + | + | + | 2   | 64    | 2   | >128 | 8  | 0.5 | >256 | >256 | 64   | 64  |
| 178 | ML2012EfS | 88 | 2012 | Fukushima | Urine            | M         | 89      | + | + | + | + | + | 2   | 64    | 2   | 0.5  | 8  | 1   | 16   | 128  | 64   | 64  |
| 179 | ML2012EfS | 89 | 2012 | Fukushima | Urinary catheter | F         | 78      | + | + | + | + | + | 4   | 64    | 2   | >128 | 8  | 64  | 16   | 128  | 64   | 64  |
| 180 | ML2012EfS | 90 | 2012 | Akita     | Urine            | M         | 59      | + | - | + | + | - | 4   | 0.125 | 2   | >128 | 8  | 32  | 16   | >256 | >256 | 1   |
| 181 | ML2012EfS | 91 | 2012 | Miyagi    | Vagina           | F         | 68      | + | + | + | + | + | 4   | 64    | 4   | >128 | 8  | 32  | >256 | >256 | >256 | 32  |
| 182 | ML2012EfS | 92 | 2012 | Fukushima | Urine            | M         | 61      | + | - | - | - | - | 1   | 0.25  | 4   | 0.25 | 8  | 1   | 16   | 128  | 128  | 2   |
| 183 | ML2012EfS | 93 | 2012 | Fukushima | Blood            | M         | 79      | + | + | + | + | + | 2   | 32    | 2   | >128 | 8  | 0.5 | >256 | >256 | >256 | 64  |
| 184 | ML2012EfS | 94 | 2012 | Miyagi    | Urine            | M         | 62      | + | + | + | + | + | 4   | 64    | 4   | >128 | 8  | 32  | >256 | >256 | >256 | 32  |
| 185 | ML2012EfS | 95 | 2012 | Fukushima | Urine            | M         | 0       | + | + | + | + | + | 4   | 64    | 2   | >128 | 8  | 0.5 | >256 | >256 | 64   | 64  |
| 186 | ML2012EfS | 96 | 2012 | Fukushima | Vagina           | Unknown   | 83      | + | + | + | + | + | 2   | 32    | 2   | 0.5  | 8  | 1   | 16   | 128  | 128  | 64  |
| 187 | ML2011EfS | 1  | 2011 | Kanagawa  | Urine            | M         | 99      | + | - | - | - | - | 2   | 0.25  | 2   | 2    | 8  | 1   | 16   | 64   | 64   | 1   |
| 188 | ML2011EfS | 2  | 2011 | Chiba     | Urine            | M         | 87      | + | + | + | + | + | 2   | 32    | 2   | >128 | 8  | 128 | 16   | 64   | 64   | 64  |
| 189 | ML2011EfS | 3  | 2011 | Ishikawa  | Urine            | F         | Unknown | + | + | + | + | + | 1   | 32    | 1   | >128 | 8  | 1   | 16   | >256 | 64   | 64  |
| 190 | ML2011EfS | 4  | 2011 | Tochigi   | Urine            | M         | Unknown | + | + | + | + | + | 1   | 32    | 1   | 0.25 | 8  | 64  | 16   | >256 | 64   | 64  |
| 191 | ML2011EfS | 5  | 2011 | Tochigi   | Urine            | F         | 68      | + | + | + | + | + | 1   | 0.25  | 2   | 1    | 8  | 1   | >256 | >256 | 64   | 1   |
| 192 | ML2011EfS | 6  | 2011 | Kanagawa  | Urine            | M         | Unknown | + | - | - | - | - | 2   | 0.25  | 2   | 2    | 8  | 1   | 16   | 64   | 64   | 1   |
| 193 | ML2011EfS | 7  | 2011 | Chiba     | Urinary catheter | F         | 82      | + | - | - | - | - | 1   | 0.25  | 2   | 2    | 8  | 1   | 16   | 32   | 32   | 0.5 |
| 194 | ML2011EfS | 8  | 2011 | Tokyo     | Urine            | M         | 70      | + | + | + | + | + | 1   | 16    | 1   | 2    | 8  | 1   | 16   | 64   | 64   | 64  |
| 195 | ML2011EfS | 9  | 2011 | Wakayama  | Urine            | F         | Unknown | + | + | + | + | + | 1   | 0.25  | 2   | 1    | 8  | 1   | 16   | 32   | 32   | 1   |
| 196 | ML2011EfS | 10 | 2011 | Kanagawa  | Urine            | M         | 77      | + | - | - | + | - | 1   | 16    | 1   | 1    | 8  | 1   | 16   | 64   | 64   | 32  |
| 197 | ML2011EfS | 11 | 2011 | Tokyo     | Urine            | M         | 83      | + | - | - | - | - | 2   | 0.25  | 2   | 2    | 8  | 2   | 16   | 64   | 64   | 1   |
| 198 | ML2011EfS | 12 | 2011 | Gunma     | Urine            | M         | 91      | + | + | + | + | + | 2   | 32    | 4   | 0.5  | 8  | 128 | >256 | 32   | 32   | 64  |
| 199 | ML2011EfS | 13 | 2011 | Aichi     | Urine            | F         | Unknown | + | + | + | - | - | 1   | 32    | 4   | >128 | 8  | 128 | 16   | >256 | 64   | 64  |
| 200 | ML2011EfS | 14 | 2011 | Kanagawa  | Earwax           | F         | 89      | + | + | + | + | + | 1   | 32    | 1   | >128 | 8  | 1   | 16   | >256 | 64   | 64  |
| 201 | ML2011EfS | 15 | 2011 | Ibaraki   | Urine            | F         | 69      | + | + | + | + | + | 1   | 32    | 1   | 1    | 8  | 1   | 16   | 32   | 64   | 64  |
| 202 | ML2011EfS | 16 | 2011 | Tokyo     | Urine            | F         | 57      | + | - | - | + | - | 1   | 32    | 1   | >128 | 64 | 0.5 | 16   | >256 | 64   | 64  |
| 203 | ML2011EfS | 17 | 2011 | Tokyo     | Urine            | F         | 28      | + | - | - | + | - | 1   | 16    | 1   | 1    | 8  | 1   | 16   | 64   | 64   | 64  |
| 204 | ML2011EfS | 18 | 2011 | Kanagawa  | Pus              | F         | 61      | + | - | - | + | - | 1   | 4     | 1   | 1    | 8  | 1   | 16   | 64   | 64   | 32  |
| 205 | ML2011EfS | 19 | 2011 | Tokyo     | Urine            | M         | 57      | + | + | + | + | + | 1   | 32    | 1   | >128 | 8  | 1   | 16   | >256 | 64   | 64  |
| 206 | ML2011EfS | 20 | 2011 | Wakayama  | Urine            | M         | 75      | + | + | + | + | + | 2   | 4     | 4   | >128 | 8  | 32  | >256 | >256 | >256 | 8   |
| 207 | ML2011EfS | 21 | 2011 | Chiba     | Urine            | F         | 73      | + | + | + | + | + | 2   | 16    | 1   | >128 | 8  | 64  | >256 | >256 | 64   | 32  |
| 208 | ML2011EfS | 22 | 2011 | Mie       | Urinary catheter | M         | 79      | + | + | + | + | + | 1   | 0.25  | 2   | 2    | 8  | 1   | >256 | >256 | 32   | 1   |
| 209 | ML2011EfS | 23 | 2011 | Chiba     | Urine            | M         | 79      | + | + | + | + | + | 2   | 16    | 1   | >128 | 8  | 64  | >256 | >256 | 32   | 32  |
| 210 | ML2011EfS | 24 | 2011 | Gunma     | Decubitus        | F         | Unknown | + | + | + | + | + | 2   | 4     | 4   | >128 | 8  | 32  | 16   | >256 | >256 | 16  |
| 211 | ML2011EfS | 25 | 2011 | Aichi     | Urine            | F         | 40      | + | - | - | + | - | 1   | 32    | 1   | >128 | 64 | 1   | >256 | >256 | >256 | 64  |
| 212 | ML2011EfS | 26 | 2011 | Aichi     | Urine            | M         | 85      | + | + | + | + | + | 2   | 0.25  | 2   | 2    | 8  | 2   | 16   | 64   | 64   | 1   |
| 213 | ML2011EfS | 27 | 2011 | Tokyo     | Urine            | M         | 86      | + | + | + | + | + | 1   | 0.125 | 2   | 2    | 4  | 1   | 16   | 128  | 64   | 1   |
| 214 | ML2011EfS | 28 | 2011 | Ibaraki   | Decubitus        | F         | 93      | + | - | - | + | - | 1   | 32    | 2   | >128 | 8  | 2   | >256 | >256 | >256 | 64  |
| 215 | ML2011EfS | 29 | 2011 | Tokyo     | Urine            | M         | 78      | + | + | + | + | + | 1   | 32    | 2   | >128 | 32 | 1   | >256 | >256 | 64   | 64  |
| 216 | ML2011EfS | 30 | 2011 | Kanagawa  | Vagina           | F         | 74      | + | + | + | + | + | 1   | 16    | 2   | >128 | 8  | 2   | 256  | >256 | 64   | 64  |
| 217 | ML2011EfS | 31 | 2011 | Tokyo     | Urine            | F         | 44      | + | + | + | + | + | 1   | 16    | 1   | >128 | 8  | 2   | >256 | >256 | 64   | 64  |
| 218 | ML2011EfS | 32 | 2011 | Tokyo     | Urine            | F         | 55      | + | - | - | - | - | 1   | 16    | 1   | 2    | 8  | 2   | 16   | 64   | 64   | 64  |
| 219 | ML2011EfS | 33 | 2011 | Tokyo     | Urine            | M         | 66      | + | - | - | + | - | 2   | 32    | 2   | >128 | 8  | 2   | 16   | 64   | 32   | 64  |
| 220 | ML2011EfS | 34 | 2011 | Kanagawa  | Urine            | M         | 90      | + | + | + | + | + | 1   | 32    | 2   | >128 | 8  | 2   | 256  | >256 | 64   | 64  |
| 221 | ML2011EfS | 35 | 2011 | Toyama    | Urine            | F         | Unknown | + | + | + | + | + | 2   | 4     | 4   | 0.25 | 8  | 32  | >256 | >256 | 64   | 16  |
| 222 | ML2011EfS | 36 | 2011 | Ishikawa  | Earwax           | M         | 0       | + | - | - | + | - | 1   | 32    | 2   | >128 | 32 | 1   | 16   | >256 | >256 | 64  |
| 223 | ML2011EfS | 37 | 2011 | Tokyo     | Urine            | F         | 95      | + | - | - | + | - | 1   | 32    | 2   | >128 | 8  | 2   | 16   | 128  | 128  | 64  |
| 224 | ML2011EfS | 38 | 2011 | Tokyo     | Vagina           | F         | 36      | + | - | - | + | - | 1   | 16    | 1   | >128 | 32 | 1   | 16   | 128  | 128  | 64  |
| 225 | ML2011EfS | 39 | 2011 | Tokyo     | Urine            | F         | 0       | + | + | + | + | + | 1   | 32    | 2   | >128 | 8  | 2   | 16   | >256 | 64   | 64  |
| 226 | ML2011EfS | 40 | 2011 | Tokyo     | Urine            | F         | 56      | + | - | - | + | - | 1   | 16    | 2   | >128 | 32 | 1   | >256 | >256 | 64   | 64  |
| 227 | ML2011EfS | 41 | 2011 | Tokyo     | Urine            | M         | 73      | + | - | - | + | - | 1   | 16    | 1   | 1    | 8  | 2   | 16   | 64   | 64   | 64  |
| 228 | ML2011EfS | 42 | 2011 | Aichi     | Urine            | F         | 28      | + | - | - | - | - | 1   | 32    | 2   | 1    | 8  | 2   | 16   | 64   | 64   | 64  |
| 229 | ML2011EfS | 43 | 2011 | Tokyo     | Urine            | M         | 62      | + | + | + | + | + | 1   | 0.25  | 1   | 2    | 8  | 2   | >256 | >256 | 64   | 1   |
| 230 | ML2011EfS | 44 | 2011 | Tochigi   | Urine            | F         | 84      | + | - | - | - | - | 2   | 32    | 2   | >128 | 32 | 2   | 16   | >256 | 128  | 64  |
| 231 | ML2011EfS | 45 | 2011 | Aichi     | Pus              | M         | 63      | + | - | - | - | - | 1   | 0.25  | 2   | 2    | 8  | 2   | 16   | 64   | 64   | 1   |
| 232 | ML2011EfS | 46 | 2011 | Tokyo     | Urine            | M         | 78      | + | - | - | - | - | 1   | 32    | 2   | 1    | 8  | 2   | 16   | 64   | 64   | 64  |
| 233 | ML2011EfS | 47 | 2011 | Wakayama  | Decubitus        | F         | 79      | + | + | + | + | + | 1   | 32    | 16  | >128 | 8  | 2   | 16   | 128  | 64   | 64  |
| 234 | ML2011EfS | 48 | 2011 | Tokyo     | Urine            | M         | 81      | + | + | + | + | + | 1   | 32    | 2   | >128 | 32 | 2   | 16   | 64   | 128  | 64  |
| 235 | ML2011EfS | 49 | 2011 | Yamagata  | Urine            | F         | 84      | + | + | + | + | + | 1   | 32    | 2   | >128 | 8  | 2   | 256  | >256 | 64   | 64  |
| 236 | ML2011EfS | 50 | 2011 | Yamagata  | Urine            | F         | 94      | + | + | + | + | + | 1   | 32    | 2   | >128 | 8  | 2   | 16   | 64   | 64   | 64  |
| 237 | ML2011EfS | 51 | 2011 | Wakayama  | Urinary catheter | F         | 66      | + | + | + | + | + | 1   | 0.125 | 1   | >128 | 8  | 1   | >256 | >256 | >256 | 0.5 |
| 238 | ML2011EfS | 52 | 2011 | Toyama    | Urine            | F         | 78      | + | + | + | + | + | 2   | 2     | 2   | >128 | 8  | 32  | 256  | >256 | >256 | 8   |
| 239 | ML2011EfS | 53 | 2011 | Ishikawa  | Urine            | M         | Unknown | + | - | - | + | - | 1   | 32    | 1   | >128 | 8  | 0.5 | >256 | >256 | 64   | 64  |
| 240 | ML2011EfS | 54 | 2011 | Saitama   | Pus              | M         | 31      | + | - | - | - | - | 0.5 | 0.25  | 0.5 | >128 | 4  | 4   | 16   | 64   | 32   | 0.5 |
| 241 | ML2011EfS | 55 | 2011 | Saitama   | Urine            | F         | 57      | + | + | + | + | + | 2   | 4     | 4   | >128 | 8  | 32  | 16   | >256 | >256 | 64  |
| 242 | ML2011EfS | 57 | 2011 | Tokyo     | Urine            | M         | 41      | + | + | + | + | + | 1   | 32    | 1   | >128 | 8  | 1   | 16   | 64   | 64   | 64  |
| 243 | ML2011EfS | 58 | 2011 | Kumamoto  | Urine            | F         | 56      | + | + | + | + | + | 2   | 32    | 2   | >128 | 8  | 64  | >256 | >256 | 128  | 128 |
| 244 | ML2011EfS | 59 | 2011 | Tokyo     | Urine            | M         | 97      | + | + | + | + | + | 2   | 4     | 4   | >128 | 8  | 32  | >256 | >256 | 64   | 16  |
| 245 | ML2011EfS | 60 | 2011 | Ibaraki   | Urinary catheter | F         | 80      | + | + | + | + | + | 2   | 32    | 1   | >128 | 8  | 1   | >256 | >256 | 32   | 64  |
| 246 | ML2011EfS | 61 | 2011 | Aichi     | Vagina           | F         | 74      | + | + | + | + | + | 2   | 16    | 2   | 1    | 8  | 1   | 16   | 64   | 64   | 32  |
| 247 | ML2011EfS | 62 | 2011 | Kanagawa  | Skin             | M         | 54      | + | + | + | + | + | 2   | 32    | 1   | >128 | 8  | 1   | 16   | 64   | 64   | 64  |
| 248 | ML2011EfS | 63 | 2011 | Nagano    | Sputum           | F         | 87      | + | + | + | + | + | 1   | 32    | 1   | >128 | 8  | 1   | 16   | >256 | 64   | 128 |
| 249 | ML2011EfS | 64 | 2011 | Tokyo     | Urine            | M         | 69      | + | - | - | - | - | 1   | 0.25  | 2   | 0.5  | 8  | 1   | 16   | 32   | 64   | 0.5 |
| 250 | ML2011EfS | 65 | 2011 | Ishikawa  | Milk             | F         | Unknown | + | - | - | + | - | 1   | 32    | 1   | 0.5  | 8  | 1   | 16   | 32   | 64   | 64  |
| 251 | ML2011EfS | 66 | 2011 | Aichi     | Urine            | Unknown</ |         |   |   |   |   |   |     |       |     |      |    |     |      |      |      |     |

|     |           |     |      |           |                   |         |         |   |   |   |   |   |     |       |   |      |     |     |      |      |      |     |
|-----|-----------|-----|------|-----------|-------------------|---------|---------|---|---|---|---|---|-----|-------|---|------|-----|-----|------|------|------|-----|
| 265 | ML2011EFs | 80  | 2011 | Kanagawa  | Urine             | M       | 79      | + | + | + | + | + | 1   | 32    | 1 | >128 | 8   | 2   | 256  | >256 | 64   | 32  |
| 266 | ML2011EFs | 81  | 2011 | Kanagawa  | Urine             | M       | 72      | + | - | - | + | - | 1   | 32    | 2 | >128 | 32  | 2   | 16   | 128  | 128  | 64  |
| 267 | ML2011EFs | 82  | 2011 | Tokyo     | Decubitus         | F       | 82      | + | + | + | + | + | 2   | 4     | 2 | >128 | 8   | 32  | >256 | >256 | >256 | 16  |
| 268 | ML2011EFs | 83  | 2011 | Ibaraki   | Urine             | F       | 71      | + | - | - | + | - | 1   | 0.25  | 2 | 1    | 8   | 2   | 16   | 64   | 128  | 1   |
| 269 | ML2011EFs | 84  | 2011 | Chiba     | Urine             | F       | 67      | + | - | - | - | - | 1   | 0.25  | 2 | 0.25 | 8   | 2   | 16   | 128  | 128  | 1   |
| 270 | ML2011EFs | 85  | 2011 | Chiba     | Urine             | M       | 85      | + | - | - | + | - | 1   | 32    | 1 | >128 | 64  | 1   | >256 | >256 | 128  | 64  |
| 271 | ML2011EFs | 86  | 2011 | Kanagawa  | Urine             | M       | 80      | + | + | + | + | + | 2   | 32    | 4 | 0.25 | 8   | 32  | 16   | 32   | 32   | 32  |
| 272 | ML2011EFs | 87  | 2011 | Okayama   | Lung              | M       | 81      | + | - | - | + | - | 1   | 32    | 2 | >128 | 8   | 1   | >256 | >256 | >256 | 64  |
| 273 | ML2011EFs | 88  | 2011 | Chiba     | Urine             | M       | 30      | + | + | + | + | + | 1   | 32    | 1 | 1    | 4   | 2   | 16   | 64   | 64   | 64  |
| 274 | ML2011EFs | 89  | 2011 | Shizuoka  | Urine             | M       | 81      | + | + | + | + | + | 2   | 0.25  | 1 | >128 | 8   | 1   | 16   | 64   | 64   | 0.5 |
| 275 | ML2011EFs | 90  | 2011 | Osaka     | Vascular catheter | F       | 70      | + | + | + | + | + | 2   | 32    | 4 | >128 | 8   | 32  | 16   | >256 | >256 | 32  |
| 276 | ML2011EFs | 91  | 2011 | Aichi     | Urine             | Unknown | Unknown | + | + | + | + | + | 2   | 32    | 4 | >128 | 8   | 32  | >256 | >256 | >256 | 64  |
| 277 | ML2011EFs | 92  | 2011 | Nagano    | Urine             | F       | 37      | + | - | - | + | - | 1   | 32    | 1 | 0.5  | 8   | 2   | 16   | 128  | 128  | 64  |
| 278 | ML2011EFs | 93  | 2011 | Nagano    | Vagina            | F       | 26      | + | + | + | + | + | 1   | 32    | 2 | >128 | 8   | 1   | >256 | >256 | 64   | 64  |
| 279 | ML2011EFs | 94  | 2011 | Aichi     | Urine             | Unknown | Unknown | + | + | + | + | + | 2   | 32    | 2 | >128 | 8   | 128 | >256 | >256 | 64   | 64  |
| 280 | ML2011EFs | 95  | 2011 | Toyama    | Urinary catheter  | Unknown | Unknown | + | + | + | + | + | 2   | 4     | 4 | >128 | 8   | 32  | >256 | >256 | >256 | 16  |
| 281 | ML2011EFs | 96  | 2011 | Wakayama  | Urine             | F       | 80      | + | + | + | + | + | 1   | 0.25  | 4 | >128 | 8   | 32  | 16   | >256 | >256 | 1   |
| 282 | ML2011EFs | 97  | 2011 | Yamagata  | Ascites           | M       | 77      | + | - | - | + | - | 1   | 0.25  | 2 | 1    | 8   | 2   | >256 | >256 | 128  | 0.5 |
| 283 | ML2011EFs | 98  | 2011 | Chiba     | Blood             | M       | 81      | + | - | - | - | - | 1   | 2     | 1 | 1    | 8   | 1   | 16   | 32   | 32   | 64  |
| 284 | ML2011EFs | 99  | 2011 | Gunma     | Urine             | M       | Unknown | + | - | - | + | - | 1   | 32    | 1 | >128 | 8   | 1   | >256 | >256 | 64   | 64  |
| 285 | ML2011EFs | 100 | 2011 | Tochigi   | Urine             | F       | 91      | + | + | + | + | + | 1   | 0.25  | 2 | >128 | 8   | 1   | 16   | 64   | 64   | 0.5 |
| 286 | ML2011EFs | 101 | 2011 | Saitama   | Urine             | M       | 82      | + | + | + | + | + | 2   | 32    | 2 | 1    | 8   | 64  | >256 | >256 | 32   | 32  |
| 287 | ML2011EFs | 102 | 2011 | Chiba     | Urine             | F       | 85      | + | - | - | + | - | 1   | 32    | 1 | >128 | 32  | 1   | >256 | >256 | >256 | 64  |
| 288 | ML2011EFs | 103 | 2011 | Gunma     | Urine             | F       | Unknown | + | - | - | + | - | 1   | 16    | 1 | 1    | 8   | 0.5 | 16   | 64   | 64   | 64  |
| 289 | ML2011EFs | 104 | 2011 | Chiba     | Urine             | F       | 90      | + | + | + | + | + | 2   | 16    | 2 | >128 | 8   | 32  | 16   | >256 | >256 | 8   |
| 290 | ML2011EFs | 105 | 2011 | Fukushima | Urine             | F       | 92      | + | - | - | - | - | 0.5 | 0.125 | 1 | 1    | 8   | 0.5 | 16   | 32   | 32   | 64  |
| 291 | ML2011EFs | 106 | 2011 | Wakayama  | Urine             | M       | 79      | + | + | + | + | + | 2   | 16    | 1 | 0.25 | 8   | 1   | 16   | 64   | 64   | 32  |
| 292 | ML2011EFs | 107 | 2011 | Tochigi   | Urine             | F       | 29      | + | + | + | + | + | 1   | 32    | 1 | 1    | 8   | 1   | 16   | 64   | 64   | 64  |
| 293 | ML2011EFs | 108 | 2011 | Hiroshima | Decubitus         | Unknown | 76      | + | - | - | + | - | 1   | 32    | 1 | >128 | 32  | 1   | >256 | >256 | >256 | 64  |
| 294 | ML2011EFs | 109 | 2011 | Wakayama  | Urine             | M       | 81      | + | + | + | + | + | 1   | 32    | 1 | >128 | 8   | 1   | >256 | >256 | 64   | 64  |
| 295 | ML2011EFs | 110 | 2011 | Aomori    | Urine             | F       | 75      | + | + | + | + | + | 2   | 32    | 1 | >128 | 8   | 1   | 16   | >256 | 64   | 64  |
| 296 | ML2011EFs | 111 | 2011 | Gifu      | Urine             | F       | 63      | + | + | + | + | + | 2   | 32    | 1 | >128 | 8   | 1   | 16   | 64   | 64   | 64  |
| 297 | ML2011EFs | 112 | 2011 | Wakayama  | Urine             | M       | 75      | + | + | + | + | + | 1   | 0.125 | 2 | >128 | 8   | 0.5 | >256 | >256 | 64   | 0.5 |
| 298 | ML2011EFs | 113 | 2011 | Gunma     | Urine             | Unknown | Unknown | + | + | + | + | + | 1   | 32    | 2 | >128 | 8   | 1   | 16   | 64   | 64   | 64  |
| 299 | ML2011EFs | 114 | 2011 | Gunma     | Urine             | Unknown | Unknown | + | + | + | + | + | 1   | 32    | 1 | >128 | 8   | 1   | 256  | >256 | 64   | 64  |
| 300 | ML2011EFs | 115 | 2011 | Wakayama  | Urine             | F       | 88      | + | - | - | - | - | 1   | 32    | 1 | 0.5  | 8   | 1   | 16   | 64   | 64   | 64  |
| 301 | ML2011EFs | 116 | 2011 | Tochigi   | Vagina            | Unknown | Unknown | + | + | + | + | + | 1   | 32    | 1 | >128 | 8   | 1   | 16   | >256 | 64   | 64  |
| 302 | ML2011EFs | 117 | 2011 | Yamagata  | Urine             | F       | 67      | + | + | + | + | + | 2   | 16    | 1 | >128 | 8   | 1   | 16   | 64   | 64   | 32  |
| 303 | ML2011EFs | 118 | 2011 | Wakayama  | Urine             | F       | 92      | + | - | - | + | - | 1   | 0.125 | 2 | 1    | 8   | 1   | 16   | 64   | 64   | 0.5 |
| 304 | ML2011EFs | 119 | 2011 | Yamagata  | Urine             | F       | 88      | + | - | - | - | - | 1   | 16    | 1 | >128 | 8   | 2   | 16   | 128  | 64   | 64  |
| 305 | ML2011EFs | 120 | 2011 | Wakayama  | Urine             | M       | 92      | + | + | + | + | + | 1   | 32    | 1 | 1    | 8   | 1   | 16   | 64   | 64   | 64  |
| 306 | ML2011EFs | 121 | 2011 | Aichi     | Urine             | F       | 65      | + | - | - | + | - | 2   | 0.125 | 1 | >128 | 8   | 2   | 16   | >256 | >256 | 0.5 |
| 307 | ML2011EFs | 122 | 2011 | Tochigi   | Urine             | M       | 66      | + | + | + | + | + | 2   | 8     | 2 | >128 | 8   | 32  | 16   | >256 | >256 | 16  |
| 308 | ML2011EFs | 123 | 2011 | Shizuoka  | Urine             | M       | 62      | + | + | + | + | + | 2   | 32    | 1 | 0.5  | 8   | 0.5 | 16   | 64   | 32   | 128 |
| 309 | ML2011EFs | 124 | 2011 | Fukui     | Urine             | M       | 57      | + | - | - | - | - | 1   | 0.125 | 1 | 0.25 | 8   | 2   | 16   | 128  | 64   | 0.5 |
| 310 | ML2011EFs | 125 | 2011 | Osaka     | Urine             | M       | 71      | + | + | + | + | + | 1   | 32    | 1 | >128 | 8   | 1   | 16   | >256 | 64   | 128 |
| 311 | ML2011EFs | 126 | 2011 | Tochigi   | Urine             | F       | 80      | + | - | - | + | - | 1   | 32    | 1 | >128 | 8   | 1   | 16   | 64   | 64   | 128 |
| 312 | ML2011EFs | 127 | 2011 | Tokyo     | Urine             | F       | 72      | + | + | + | + | + | 1   | 0.25  | 4 | 0.5  | 8   | 2   | 16   | 64   | 64   | 0.5 |
| 313 | ML2011EFs | 129 | 2011 | Fukui     | Urine             | F       | 83      | + | + | + | - | - | 2   | 16    | 2 | 0.5  | 8   | 1   | 16   | 64   | 64   | 32  |
| 314 | ML2011EFs | 130 | 2011 | Aichi     | Urine             | Unknown | 72      | + | + | + | + | + | 1   | 32    | 2 | >128 | 8   | 2   | 16   | 64   | 64   | 64  |
| 315 | ML2011EFs | 131 | 2011 | Aichi     | Sputum            | M       | 79      | + | + | + | + | + | 1   | 16    | 2 | >128 | 8   | 1   | >256 | >256 | 64   | 64  |
| 316 | ML2011EFs | 132 | 2011 | Osaka     | Blood             | F       | 90      | + | + | + | + | + | 2   | 16    | 2 | >128 | 8   | 64  | >256 | >256 | 64   | 32  |
| 317 | ML2011EFs | 133 | 2011 | Ishikawa  | Urine             | M       | 91      | + | - | - | - | - | 2   | 16    | 2 | 0.5  | 4   | 1   | 16   | 64   | 64   | 32  |
| 318 | ML2011EFs | 134 | 2011 | Ishikawa  | Urine             | F       | 86      | + | - | - | - | - | 1   | 0.25  | 2 | 1    | 8   | 2   | 16   | 64   | 64   | 16  |
| 319 | ML2011EFs | 135 | 2011 | Gifu      | Urine             | F       | 81      | + | - | - | - | - | 1   | 32    | 2 | >128 | 64  | 64  | >256 | >256 | >256 | 256 |
| 320 | ML2011EFs | 136 | 2011 | Nagano    | Urine             | F       | 29      | + | + | + | + | + | 1   | 16    | 2 | >128 | 32  | 2   | >256 | >256 | >256 | 64  |
| 321 | ML2011EFs | 137 | 2011 | Nagano    | Urine             | M       | 79      | + | - | + | + | - | 1   | 32    | 2 | 2    | 4   | 0.5 | 16   | 32   | 64   | 64  |
| 322 | ML2011EFs | 138 | 2011 | Shizuoka  | Urine             | Unknown | 78      | - | - | - | + | - | 2   | 32    | 2 | >128 | 8   | 0.5 | 256  | >256 | 64   | 64  |
| 323 | ML2011EFs | 139 | 2011 | Tokyo     | Urine             | M       | 57      | - | - | - | + | - | 1   | 32    | 2 | >128 | 4   | 0.5 | 16   | 32   | 64   | 64  |
| 324 | ML2011EFs | 140 | 2011 | Tokyo     | Eye               | F       | 84      | - | - | - | - | - | 1   | 16    | 2 | 0.5  | 4   | 1   | 16   | 64   | 64   | 32  |
| 325 | ML2011EFs | 141 | 2011 | Tokyo     | Urine             | F       | 58      | - | - | - | + | - | 1   | 16    | 2 | 1    | 4   | 1   | 16   | 128  | 64   | 64  |
| 326 | ML2011EFs | 142 | 2011 | Tokyo     | Gauze             | M       | 60      | + | - | - | - | - | 1   | 0.25  | 2 | 0.25 | 8   | 2   | 16   | 64   | 64   | 1   |
| 327 | ML2011EFs | 143 | 2011 | Tokyo     | Urine             | M       | 82      | + | + | + | + | + | 2   | 16    | 2 | >128 | 4   | 1   | 16   | 64   | 64   | 64  |
| 328 | ML2011EFs | 144 | 2011 | Kanagawa  | Urine             | M       | 9       | + | + | + | + | + | 2   | 32    | 1 | >128 | 8   | 2   | 256  | >256 | 64   | 64  |
| 329 | ML2011EFs | 145 | 2011 | Aichi     | Urine             | Unknown | Unknown | + | + | + | + | + | 2   | 32    | 4 | >128 | 4   | 32  | 16   | >256 | >256 | 64  |
| 330 | ML2011EFs | 146 | 2011 | Aichi     | Urine             | F       | 75      | + | + | + | + | + | 1   | 16    | 1 | >128 | 8   | 1   | 256  | >256 | 64   | 64  |
| 331 | ML2011EFs | 147 | 2011 | Ishikawa  | Urine             | F       | Unknown | + | + | + | + | + | 1   | 32    | 2 | >128 | 8   | 1   | 256  | >256 | 64   | 64  |
| 332 | ML2011EFs | 148 | 2011 | Aichi     | Urine             | F       | 77      | + | + | + | + | + | 1   | 32    | 2 | >128 | 8   | 1   | 256  | >256 | 64   | 64  |
| 333 | ML2011EFs | 149 | 2011 | Nagano    | Urine             | M       | 18      | + | - | - | + | - | 1   | 32    | 1 | >128 | 8   | 2   | 16   | 64   | >256 | 64  |
| 334 | ML2011EFs | 150 | 2011 | Kanagawa  | Urine             | F       | 43      | + | - | - | - | - | 1   | 32    | 2 | >128 | 8   | 2   | 16   | 128  | 64   | 128 |
| 335 | ML2011EFs | 151 | 2011 | Ishikawa  | Urine             | F       | 81      | + | + | + | + | + | 2   | 2     | 2 | >128 | 8   | 32  | 16   | >256 | >256 | 8   |
| 336 | ML2011EFs | 153 | 2011 | Nagano    | Vagina            | F       | 25      | + | + | + | + | + | 1   | 32    | 2 | >128 | 8   | 1   | 16   | >256 | 64   | 64  |
| 337 | ML2011EFs | 154 | 2011 | Nagano    | Vagina            | F       | 33      | + | + | + | + | + | 1   | 16    | 1 | >128 | 8   | 1   | 16   | 64   | 64   | 64  |
| 338 | ML2011EFs | 155 | 2011 | Nagano    | Urine             | F       | 63      | + | + | + | + | + | 1   | 32    | 1 | >128 | 8   | 1   | >256 | >256 | 64   | 64  |
| 339 | ML2011EFs | 156 | 2011 | Nagano    | Urine             | F       | 25      | + | + | + | + | + | 1   | 32    | 1 | >128 | 8</ |     |      |      |      |     |

|     |           |     |           |               |                  |         |         |   |   |   |   |   |    |      |    |      |     |     |      |      |      |     |
|-----|-----------|-----|-----------|---------------|------------------|---------|---------|---|---|---|---|---|----|------|----|------|-----|-----|------|------|------|-----|
| 354 | ML2011EFs | 171 | 2011      | Tochigi       | Urine            | F       | 51      | + | + | + | + | + | 1  | 32   | 1  | >128 | 8   | 2   | 16   | >256 | 32   | 64  |
| 355 | ML2011EFs | 172 | 2011      | Tochigi       | Urine            | F       | 72      | + | + | + | + | + | 1  | 32   | 1  | >128 | 8   | 1   | 16   | 64   | 64   | 64  |
| 356 | ML2011EFs | 173 | 2011      | Ishikawa      | Urine            | F       | Unknown | + | - | - | - | - | 1  | 0.25 | 1  | 1    | 8   | 2   | 16   | 64   | 64   | 1   |
| 357 | ML2011EFs | 174 | 2011      | Ishikawa      | Skin             | F       | Unknown | + | + | + | + | + | 1  | 32   | 1  | >128 | 8   | 1   | 256  | >256 | 64   | 64  |
| 358 | ML2011EFs | 175 | 2011      | Tokyo         | Urine            | F       | 53      | + | - | - | + | - | 1  | 16   | 2  | 2    | 8   | 1   | 16   | 64   | 64   | 32  |
| 359 | ML2011EFs | 176 | 2011      | Tokyo         | Urine            | M       | 90      | + | + | + | + | + | 1  | 2    | 2  | 0.5  | 8   | 32  | 16   | >256 | 256  | 8   |
| 360 | ML2011EFs | 177 | 2011      | Tokyo         | Urine            | M       | 69      | + | + | + | + | + | 1  | 16   | 1  | >128 | 32  | 1   | 16   | 64   | 64   | 64  |
| 361 | ML2011EFs | 178 | 2011      | Tokyo         | Urine            | F       | 69      | + | + | + | + | + | 1  | 32   | 1  | >128 | 8   | 1   | >256 | >256 | 32   | 32  |
| 362 | ML2011EFs | 179 | 2011      | Tokyo         | Urine            | M       | 0       | + | + | + | + | + | 2  | 8    | 2  | 0.25 | 8   | 1   | 16   | 64   | 64   | 16  |
| 363 | ML2011EFs | 180 | 2011      | Tokyo         | Urine            | F       | 67      | + | - | - | + | - | 1  | 0.25 | 4  | 0.25 | 8   | 2   | 16   | 64   | 64   | 1   |
| 364 | ML2011EFs | 181 | 2011      | Saitama       | Urine            | F       | 86      | + | - | - | + | - | 1  | 32   | 1  | 1    | 8   | 2   | 16   | 64   | 64   | 64  |
| 365 | ML2011EFs | 182 | 2011      | Wakayama      | Urine            | F       | 27      | + | + | + | + | + | 1  | 8    | 1  | 1    | 8   | 1   | 16   | 64   | 128  | 8   |
| 366 | ML2011EFs | 183 | 2011      | Tokyo         | Urine            | M       | 63      | + | - | - | + | - | 1  | 0.25 | 2  | 0.5  | 4   | 1   | 16   | 64   | 64   | 1   |
| 367 | ML2011EFs | 184 | 2011      | Chiba         | Glans pus        | M       | 4       | + | + | + | + | + | 1  | 32   | 1  | >128 | 8   | 1   | >256 | >256 | 64   | 64  |
| 368 | ML2011EFs | 185 | 2011      | Tokyo         | Urine            | M       | 67      | + | - | - | + | - | 1  | 32   | 2  | >128 | 32  | 1   | 16   | 64   | 64   | 64  |
| 369 | ML2011EFs | 186 | 2011      | Ishikawa      | Vagina           | F       | 63      | + | - | - | - | - | 1  | 16   | 2  | 0.5  | 8   | 1   | 16   | 64   | 128  | 32  |
| 370 | ML2011EFs | 187 | 2011      | Ishikawa      | Urine            | F       | Unknown | - | - | - | - | - | 1  | 32   | 4  | 1    | 8   | 2   | 16   | 64   | 64   | 32  |
| 371 | ML2011EFs | 188 | 2011      | Ishikawa      | Urinary catheter | Unknown | 91      | + | + | + | + | + | 2  | 4    | 2  | >128 | 8   | 64  | 32   | 128  | 128  | 8   |
| 372 | ML2011EFs | 189 | 2011      | Ishikawa      | Urine            | M       | 64      | + | + | + | + | + | 1  | 32   | 1  | >128 | 4   | 2   | 32   | >256 | 64   | 64  |
| 373 | ML2011EFs | 190 | 2011      | Ishikawa      | Urinary catheter | F       | 98      | + | - | - | + | - | 1  | 32   | 1  | >128 | 64  | 1   | 16   | 64   | 128  | 64  |
| 374 | ML2011EFs | 191 | 2011      | Nagano        | Urine            | F       | 20      | + | + | + | + | + | 1  | 32   | 2  | >128 | 8   | 1   | >256 | >256 | 64   | 64  |
| 375 | ML2011EFs | 192 | 2011      | Nagano        | Vagina           | F       | 28      | + | + | + | + | + | 1  | 32   | 2  | >128 | 8   | 1   | >256 | >256 | 64   | 64  |
| 376 | ML2011EFs | 193 | 2011      | Nagano        | Vagina           | F       | 49      | + | - | - | + | - | 1  | 0.25 | 2  | 1    | 8   | 2   | 16   | 64   | 64   | 0.5 |
| 377 | ML2011EFs | 194 | 2011      | Nagano        | Urine            | F       | 57      | + | - | - | - | - | 1  | 0.25 | 2  | 2    | 8   | 2   | 16   | 64   | 128  | 0.5 |
| 378 | ML2011EFs | 195 | 2011      | Nagano        | Vagina           | F       | 30      | + | - | - | - | - | 1  | 32   | 2  | 1    | 4   | 2   | 16   | 64   | 128  | 64  |
| 379 | ML2011EFs | 196 | 2011      | Nagano        | Urine            | F       | 42      | + | - | - | + | - | 1  | 0.25 | 2  | >128 | 8   | 1   | 16   | 64   | 64   | 0.5 |
| 380 | ML2011EFs | 197 | 2011      | Kanagawa      | Pus              | F       | 79      | + | - | - | + | - | 1  | 16   | 2  | 1    | 8   | 1   | 16   | 64   | 128  | 8   |
| 381 | ML2011EFs | 198 | 2011      | Tokyo         | Urine            | M       | 0       | + | + | + | + | + | 1  | 32   | 2  | >128 | 8   | 1   | >256 | >256 | 64   | 64  |
| 382 | ML2011EFs | 199 | 2011      | Tokyo         | Urine            | M       | 71      | + | + | + | + | + | 1  | 32   | 2  | >128 | 8   | 1   | >256 | >256 | 64   | 64  |
| 383 | ML2011EFs | 200 | 2011      | Tochigi       | Vagina           | Unknown | Unknown | + | + | + | + | + | 1  | 32   | 1  | >128 | 64  | 1   | 16   | >256 | >256 | 32  |
| 384 | MIVRE     | 41  | 1995-1999 | Michigan (US) | Unknown          | Unknown | Unknown | + | + | + | + | + | 16 | ≤32  | >8 | >256 | <32 | >32 | >256 | ≤256 | ≤256 | <32 |
| 385 | MIVRE     | 127 | 1995-1999 | Michigan (US) | Unknown          | Unknown | Unknown | + | - | - | - | - | 8  | ≤32  | >8 | >256 | <32 | >32 | >256 | <256 | >256 | 64  |
| 386 | MIVRE     | 216 | 1995-1999 | Michigan (US) | Unknown          | Unknown | Unknown | - | - | - | - | - | -  | -    | -  | -    | -   | -   | -    | -    | -    | -   |
| 387 | MIVRE     | 226 | 1995-1999 | Michigan (US) | Unknown          | Unknown | Unknown | + | - | - | + | - | 8  | ≤32  | >8 | >256 | ≤32 | ≤32 | >256 | >256 | ≤256 | ≤32 |
| 388 | MIVRE     | 244 | 1995-1999 | Michigan (US) | Unknown          | Unknown | Unknown | + | + | + | + | + | 16 | ≤32  | >8 | >256 | ≤32 | ≤32 | >256 | >256 | >256 | ≤32 |
| 389 | MIVRE     | 273 | 1995-1999 | Michigan (US) | Unknown          | Unknown | Unknown | + | - | - | - | - | 16 | ≤32  | >8 | ≤256 | ≤32 | >32 | >256 | >256 | ≤256 | ≤32 |
| 390 | MIVRE     | 276 | 1995-1999 | Michigan (US) | Unknown          | Unknown | Unknown | - | - | - | + | - | -  | -    | -  | -    | -   | -   | -    | -    | -    | -   |
| 391 | MIVRE     | 298 | 1995-1999 | Michigan (US) | Unknown          | Unknown | Unknown | + | + | + | + | + | 16 | ≤32  | >8 | >256 | ≤32 | ≤32 | >256 | >256 | >256 | ≤32 |
| 392 | MIVRE     | 368 | 1995-1999 | Michigan (US) | Unknown          | Unknown | Unknown | + | + | + | + | + | 8  | ≤32  | >8 | >256 | ≤32 | >32 | >256 | >256 | >256 | 64  |
| 393 | MIVRE     | 390 | 1995-1999 | Michigan (US) | Unknown          | Unknown | Unknown | + | + | + | + | + | 16 | ≤32  | >8 | >256 | ≤32 | >32 | >256 | >256 | ≤256 | ≤32 |
| 394 | MIVRE     | 397 | 1995-1999 | Michigan (US) | Unknown          | Unknown | Unknown | + | - | - | - | - | 8  | ≤32  | >8 | >256 | ≤32 | >32 | ≤256 | >256 | >256 | ≤32 |
| 395 | MIVRE     | 409 | 1995-1999 | Michigan (US) | Unknown          | Unknown | Unknown | - | - | - | - | - | -  | -    | -  | -    | -   | -   | -    | -    | -    | -   |
| 396 | MIVRE     | 427 | 1995-1999 | Michigan (US) | Unknown          | Unknown | Unknown | + | + | + | + | + | 16 | ≤32  | >8 | >256 | ≤32 | >32 | >256 | >256 | >256 | ≤32 |
| 397 | MIVRE     | 439 | 1995-1999 | Michigan (US) | Unknown          | Unknown | Unknown | - | - | - | + | - | -  | -    | -  | -    | -   | -   | -    | -    | -    | -   |
| 398 | MIVRE     | 454 | 1995-1999 | Michigan (US) | Unknown          | Unknown | Unknown | + | + | + | + | + | 16 | ≤32  | >8 | >256 | ≤32 | >32 | >256 | >256 | >256 | ≤32 |
| 399 | MIVRE     | 485 | 1995-1999 | Michigan (US) | Unknown          | Unknown | Unknown | - | - | - | - | - | -  | -    | -  | -    | -   | -   | -    | -    | -    | -   |
| 400 | MIVRE     | 489 | 1995-1999 | Michigan (US) | Unknown          | Unknown | Unknown | + | + | + | + | + | 16 | ≤32  | >8 | >256 | ≤32 | >32 | >256 | >256 | >256 | ≤32 |
| 401 | MIVRE     | 493 | 1995-1999 | Michigan (US) | Unknown          | Unknown | Unknown | + | + | + | + | + | 16 | ≤32  | >8 | >256 | ≤32 | >32 | >256 | >256 | >256 | ≤32 |
| 402 | MIVRE     | 508 | 1995-1999 | Michigan (US) | Unknown          | Unknown | Unknown | + | + | + | + | + | 16 | ≤32  | >8 | >256 | ≤32 | >32 | >256 | >256 | >256 | ≤32 |
| 403 | MIVRE     | 511 | 1995-1999 | Michigan (US) | Unknown          | Unknown | Unknown | + | + | + | + | + | 16 | ≤32  | >8 | >256 | ≤32 | >32 | >256 | >256 | >256 | ≤32 |
| 404 | MIVRE     | 580 | 1995-1999 | Michigan (US) | Unknown          | Unknown | Unknown | - | - | - | + | - | -  | -    | -  | -    | -   | -   | -    | -    | -    | -   |
| 405 | MIVRE     | 674 | 1995-1999 | Michigan (US) | Unknown          | Unknown | Unknown | + | - | - | - | - | 16 | ≤32  | >8 | ≤256 | ≤32 | >32 | >256 | >256 | ≤256 | ≤32 |
