# Supplementary material
Source: PubMed Central journal article supplement (PMC4984558)
Supplement: JB.00348-16_zjb999094159so4.pdf [file JB.00348-16_zjb999094159so4.pdf]

**Table S2. ST types and Bac41 genes in *E. faecalis* genome assembly (Taxonomy ID: 1134791).**

| Species | Strain                                 | Acetion       | ST              | CC  | Bac41 type | Partial | BacA | BacL1 | BacL2 | BacI1 | BacI 2 |
|---------|----------------------------------------|---------------|-----------------|-----|------------|---------|------|-------|-------|-------|--------|
| 7       | <i>Enterococcus faecalis</i>           | 1138_EFLS     | GCA_001052215.1 |     |            |         | I    | +     |       | +     | IIb    |
| 9       | <i>Enterococcus faecalis</i>           | 1164_EFLS     | GCA_001052315.1 |     |            |         | I    | +     | +     | +     | IIb    |
| 24      | <i>Enterococcus faecalis</i>           | 188_EFLS      | GCA_001055725.1 |     |            | p       | I    |       | +     | +     | IIb    |
| 25      | <i>Enterococcus faecalis</i>           | 189_EFLS      | GCA_001054535.1 |     |            | p       | I    |       | +     | +     | IIb    |
| 26      | <i>Enterococcus faecalis</i>           | 190_EFLS      | GCA_001055765.1 |     |            | p       | I    |       | +     | +     | IIb    |
| 27      | <i>Enterococcus faecalis</i>           | 191_EFLS      | GCA_001054545.1 |     |            | p       | I    |       | +     | +     | IIb    |
| 28      | <i>Enterococcus faecalis</i>           | 200_EFLS      | GCA_001055875.1 |     |            | p       | I    |       | +     | +     | IIb    |
| 34      | <i>Enterococcus faecalis</i>           | 253_EFLS      | GCA_001056075.1 |     |            |         | I    | +     | +     | +     | IIb    |
| 40      | <i>Enterococcus faecalis</i>           | 361_EFLS      | GCA_001054975.1 |     |            |         | I    | +     | +     | +     | IIb    |
| 44      | <i>Enterococcus faecalis</i>           | 412_EFLS      | GCA_001056625.1 |     |            |         | I    | +     | +     | +     | IIb    |
| 45      | <i>Enterococcus faecalis</i>           | 428_EFLS      | GCA_001056735.1 |     |            |         | I    | +     | +     | +     | IIb    |
| 46      | <i>Enterococcus faecalis</i>           | 463_EFLS      | GCA_001055135.1 |     |            |         | I    | +     | +     | +     | IIb    |
| 53      | <i>Enterococcus faecalis</i>           | 600_EFLS      | GCA_001057475.1 |     |            |         | I    | +     | +     | +     | IIb    |
| 56      | <i>Enterococcus faecalis</i>           | 610_EFLS      | GCA_001055475.1 |     |            |         | I    | +     | +     | +     | IIb    |
| 58      | <i>Enterococcus faecalis</i>           | 647_EFLS      | GCA_001057765.1 |     |            | p       | I    |       | +     | +     | IIb    |
| 59      | <i>Enterococcus faecalis</i>           | 664_rep1_EFLS | GCA_001057835.1 |     |            |         | I    | +     | +     | +     | IIb    |
| 60      | <i>Enterococcus faecalis</i>           | 668_EFLS      | GCA_001057865.1 |     |            |         | I    | +     | +     | +     | IIb    |
| 61      | <i>Enterococcus faecalis</i>           | 670_EFLS      | GCA_001058855.1 |     |            |         | I    | +     | +     | +     | IIb    |
| 62      | <i>Enterococcus faecalis</i>           | 679_EFLS      | GCA_001057915.1 |     |            |         | I    | +     | +     | +     | IIb    |
| 66      | <i>Enterococcus faecalis</i>           | 724_EFLS      | GCA_001058995.1 |     |            |         | I    | +     | +     | +     | IIb    |
| 71      | <i>Enterococcus faecalis</i>           | 864_EFLS      | GCA_001058665.1 |     |            |         | I    | +     | +     | +     | IIb    |
| 74      | <i>Enterococcus faecalis</i>           | 903_EFLS      | GCA_001059845.1 |     |            | p       | I    |       | +     | +     | IIb    |
| 79      | <i>Enterococcus faecalis</i>           | 948_EFLS      | GCA_001059635.1 |     |            |         | I    | +     | +     | +     | IIb    |
| 80      | <i>Enterococcus faecalis</i>           | 949_EFLS      | GCA_001059895.1 |     |            |         | I    | +     | +     | +     | IIb    |
| 82      | <i>Enterococcus faecalis</i>           | ATCC51299     | GCA_000772515.1 |     |            |         | I    | +     | +     | +     | IIa    |
| 121     | <i>Enterococcus faecalis</i> BM4654    | BM4654        | GCA_000479065.1 | 6   | 2          | Ib      | I    | +     | +     | +     | IIb    |
| 127     | <i>Enterococcus faecalis</i> DAPTO 512 | DAPTO-512     | GCA_000148005.1 | 103 | -          | Ib      | I    | +     | +     | +     | IIb    |
| 128     | <i>Enterococcus faecalis</i> DAPTO 516 | DAPTO_516     | GCA_000147985.1 | 103 | -          | Ib      | I    | +     | +     | +     | IIb    |
| 130     | <i>Enterococcus faecalis</i> DORA_14   | DORA_14       | GCA_000508705.1 |     |            |         | I    | +     | +     | +     | IIb    |
| 132     | <i>Enterococcus faecalis</i> E12       | E12           | GCA_000468775.1 |     |            |         | I    | +     | +     | +     | IIb    |
| 133     | <i>Enterococcus faecalis</i> E1Sol     | E1Sol         | GCA_000157395.1 | 93  | 93         | Ia      | I    | +     | +     | +     | IIa    |
| 144     | <i>Enterococcus faecalis</i> EnGen0067 | B1290         | GCA_000390945.1 | 6   | 2          | Ib      | I    | +     | +     | +     | IIb    |
| 145     | <i>Enterococcus faecalis</i> EnGen0068 | B1327         | GCA_000390965.1 | 6   | 2          | Ib      | I    | +     | +     | +     | IIb    |
| 146     | <i>Enterococcus faecalis</i> EnGen0069 | B1376         | GCA_000390985.1 | 6   | 2          | Ib      | I    | +     | +     | +     | IIb    |
| 147     | <i>Enterococcus faecalis</i> EnGen0070 | B1385         | GCA_000391005.1 | 6   | 2          | Ib      | I    | +     | +     | +     | IIb    |
| 161     | <i>Enterococcus faecalis</i> EnGen0085 | B1734         | GCA_000391205.1 | 6   | 2          | Ib      | I    | +     | +     | +     | IIb    |
| 163     | <i>Enterococcus faecalis</i> EnGen0087 | B878          | GCA_000391505.1 |     |            |         | I    | +     | +     | +     | IIb    |
| 164     | <i>Enterococcus faecalis</i> EnGen0088 | B1505         | GCA_000391045.1 | 6   | 2          | Ib      | I    | +     | +     | +     | IIb    |
| 165     | <i>Enterococcus faecalis</i> EnGen0089 | B1586         | GCA_000391085.1 | 6   | 2          | Ib      | I    | +     | +     | +     | IIb    |
| 166     | <i>Enterococcus faecalis</i> EnGen0090 | B1618         | GCA_000391105.1 | 6   | 2          | Ib      | I    | +     | +     | +     | IIb    |
| 167     | <i>Enterococcus faecalis</i> EnGen0091 | B1696         | GCA_000391165.1 | 6   | 2          | Ib      | I    | +     | +     | +     | IIb    |
| 168     | <i>Enterococcus faecalis</i> EnGen0092 | B1719         | GCA_000391185.1 | 6   | 2          | Ib      | I    | +     | +     | +     | IIb    |
| 170     | <i>Enterococcus faecalis</i> EnGen0094 | B2255         | GCA_000391285.1 | 6   | 2          | Ib      | I    | +     | +     | +     | IIb    |
| 171     | <i>Enterococcus faecalis</i> EnGen0095 | B2391         | GCA_000391305.1 | 6   | 2          | Ib      | I    | +     | +     | +     | IIb    |
| 172     | <i>Enterococcus faecalis</i> EnGen0096 | B2488         | GCA_000391325.1 | 6   | 2          | Ib      | I    | +     | +     | +     | IIb    |
| 173     | <i>Enterococcus faecalis</i> EnGen0097 | B2535         | GCA_000391345.1 | 6   | 2          | Ib      | I    | +     | +     | +     | IIb    |
| 174     | <i>Enterococcus faecalis</i> EnGen0098 | B2593         | GCA_000391385.1 | 6   | 2          | Ib      | I    | +     | +     | +     | IIb    |
| 175     | <i>Enterococcus faecalis</i> EnGen0099 | B3031         | GCA_000391405.1 | 6   | 2          | Ib      | I    | +     | +     | +     | IIb    |
| 176     | <i>Enterococcus faecalis</i> EnGen0100 | B3126         | GCA_000391465.1 | 6   | 2          | Ib      | I    | +     | +     | +     | IIb    |
| 182     | <i>Enterococcus faecalis</i> EnGen0106 | B1441         | GCA_000391025.1 | 6   | 2          | Ib      | I    | +     | +     | +     | IIb    |
| 183     | <i>Enterococcus faecalis</i> EnGen0107 | B594          | GCA_000391485.1 |     |            |         | I    | +     | +     | +     | IIb    |
| 184     | <i>Enterococcus faecalis</i> EnGen0108 | B939          | GCA_000391525.1 |     |            |         | I    | +     | +     | +     | IIb    |
| 185     | <i>Enterococcus faecalis</i> EnGen0109 | B1623         | GCA_000391125.1 | 6   | 2          | Ib      | I    | +     | +     | +     | IIb    |
| 186     | <i>Enterococcus faecalis</i> EnGen0110 | B1678         | GCA_000391145.1 | 6   | 2          | Ib      | I    | +     | +     | +     | IIb    |
| 187     | <i>Enterococcus faecalis</i> EnGen0111 | B1843         | GCA_000391225.1 | 6   | 2          | Ib      | I    | +     | +     | +     | IIb    |
| 188     | <i>Enterococcus faecalis</i> EnGen0112 | B2557         | GCA_000391365.1 | 6   | 2          | Ib      | I    | +     | +     | +     | IIb    |
| 189     | <i>Enterococcus faecalis</i> EnGen0113 | B3042         | GCA_000391425.1 | 6   | 2          | Ib      | I    | +     | +     | +     | IIb    |
| 190     | <i>Enterococcus faecalis</i> EnGen0114 | B3053         | GCA_000391445.1 | 6   | 2          | Ib      | I    | +     | +     | +     | IIb    |
| 195     | <i>Enterococcus faecalis</i> EnGen0119 | B1874         | GCA_000391245.1 | 6   | 2          | Ib      | I    | +     | +     | +     | IIb    |
| 196     | <i>Enterococcus faecalis</i> EnGen0120 | B1532         | GCA_000391065.1 | 6   | 2          | Ib      | I    | +     | +     | +     | IIb    |
| 197     | <i>Enterococcus faecalis</i> EnGen0194 | B1005         | GCA_000395985.1 | 6   | 2          | Ib      | I    | +     | +     | +     | IIb    |
| 198     | <i>Enterococcus faecalis</i> EnGen0195 | B1138         | GCA_000396005.1 | 6   | 2          | Ib      | I    | +     | +     | +     | IIb    |
| 199     | <i>Enterococcus faecalis</i> EnGen0196 | B1249         | GCA_000396025.1 | 6   | 2          | Ib      | I    | +     | +     | +     | IIb    |
| 200     | <i>Enterococcus faecalis</i> EnGen0197 | B1851         | GCA_000396045.1 | 6   | 2          | Ib      | I    | +     | +     | +     | IIb    |
| 202     | <i>Enterococcus faecalis</i> EnGen0199 | B1933         | GCA_000396085.1 | 6   | 2          | Ib      | I    | +     | +     | +     | IIb    |
| 203     | <i>Enterococcus faecalis</i> EnGen0200 | B2202         | GCA_000396105.1 | 6   | 2          | Ib      | I    | +     | +     | +     | IIb    |
| 204     | <i>Enterococcus faecalis</i> EnGen0201 | B2211         | GCA_000396125.1 | 6   | 2          | Ib      | I    | +     | +     | +     | IIb    |
| 205     | <i>Enterococcus faecalis</i> EnGen0202 | B2277         | GCA_000396145.1 | 6   | 2          | Ib      | I    | +     | +     | +     | IIb    |
| 206     | <i>Enterococcus faecalis</i> EnGen0203 | B2670         | GCA_000396165.1 | 6   | 2          | Ib      | I    | +     | +     | +     | IIb    |
| 207     | <i>Enterococcus faecalis</i> EnGen0204 | B2685         | GCA_000396185.1 | 6   | 2          | Ib      | I    | +     | +     | +     | IIb    |
| 208     | <i>Enterococcus faecalis</i> EnGen0205 | B2802         | GCA_000396225.1 | 6   | 2          | Ib      | I    | +     | +     | +     | IIb    |

|     |                                          |                 |                 |     |    |    |       |   |   |   |    |
|-----|------------------------------------------|-----------------|-----------------|-----|----|----|-------|---|---|---|----|
| 209 | Enterococcus faecalis EnGen0206          | B2864           | GCA_000396265.1 | 6   | 2  | Ib | I     | + | + | + | Ib |
| 210 | Enterococcus faecalis EnGen0207          | B2687           | GCA_000396205.1 | 6   | 2  | Ib | I     | + | + | + | Ib |
| 212 | Enterococcus faecalis EnGen0209          | B3119           | GCA_000396325.1 | 6   | 2  | Ib | I     | + | + | + | Ib |
| 213 | Enterococcus faecalis EnGen0210          | B3196           | GCA_000396345.1 | 6   | 2  | Ib | I     | + | + | + | Ib |
| 214 | Enterococcus faecalis EnGen0211          | B3286           | GCA_000396365.1 | 6   | 2  | Ib | I     | + | + | + | Ib |
| 216 | Enterococcus faecalis EnGen0213          | B4008           | GCA_000396405.1 | 6   | 2  | Ib | I     | + | + | + | Ib |
| 219 | Enterococcus faecalis EnGen0216          | B4163           | GCA_000396465.1 | 6   | 2  | Ib | I     | + | + | + | Ib |
| 220 | Enterococcus faecalis EnGen0217          | B4259           | GCA_000396485.1 | 6   | 2  | Ib | I     | + | + | + | Ib |
| 221 | Enterococcus faecalis EnGen0218          | B4267           | GCA_000396505.1 | 6   | 2  | Ib | I     | + | + | + | Ib |
| 222 | Enterococcus faecalis EnGen0219          | B4270           | GCA_000396525.1 | 6   | 2  | Ib | I     | + | + | + | Ib |
| 223 | Enterococcus faecalis EnGen0220          | B4411           | GCA_000396545.1 | 6   | 2  | Ib | I     | + | + | + | Ib |
| 225 | Enterococcus faecalis EnGen0222          | B4638           | GCA_000396585.1 | 6   | 2  | Ib | I     | + | + | + | Ib |
| 227 | Enterococcus faecalis EnGen0224          | B4674           | GCA_000396625.1 | 6   | 2  | Ib | I     | + | + | + | Ib |
| 228 | Enterococcus faecalis EnGen0225          | B4969           | GCA_000396645.1 | 6   | 2  | Ib | I     | + | + | + | Ib |
| 230 | Enterococcus faecalis EnGen0228          | B2813           | GCA_000396245.1 | 6   | 2  | Ib | I     | + | + | + | Ib |
| 231 | Enterococcus faecalis EnGen0231          | B5035           | GCA_000394355.1 | 6   | 2  | Ib | I     | + | + | + | Ib |
| 238 | Enterococcus faecalis EnGen0239          | SF26630         | GCA_000394115.1 | 6   | 2  | Ia | I     | + | + | + | Ia |
| 247 | Enterococcus faecalis EnGen0248          | SF19            | GCA_000394295.1 | 6   | 2  | Ib | I     | + | + | + | Ib |
| 251 | Enterococcus faecalis EnGen0252          | SF1592          | GCA_000394315.1 | 6   | 2  | Ib | I     | + | + | + | Ib |
| 266 | Enterococcus faecalis EnGen0294          | SF100           | GCA_000394815.1 | 6   | 2  | Ib | I     | + | + | + | Ib |
| 277 | Enterococcus faecalis EnGen0307          | SF370           | GCA_000394835.1 | 6   | 2  | Ia | I     | + | + | + | Ia |
| 278 | Enterococcus faecalis EnGen0310 = MMH594 | MMH594          | GCA_000394795.1 | 6   | 2  | Ib | I     | + | + | + | Ib |
| 286 | Enterococcus faecalis EnGen0332          | SF350           | GCA_000392675.1 | 64  | 64 | Ib | I     | + | + | + | Ib |
| 293 | Enterococcus faecalis EnGen0339          | TR161           | GCA_000393475.1 | 6   | 2  | Ia | I     | + | + | + | Ia |
| 298 | Enterococcus faecalis EnGen0345          | E99             | GCA_000392835.1 | 4   | 4  | Ib | I     | + | + | + | Ib |
| 311 | Enterococcus faecalis EnGen0361          | 79-3            | GCA_000392815.1 |     |    | Ib | I     | + | + | + | Ib |
| 314 | Enterococcus faecalis EnGen0364          | T6              | GCA_000392975.1 | 63  | 58 | Ib | I     | + | + | + | Ib |
| 316 | Enterococcus faecalis EnGen0366          | 599951          | GCA_000392775.1 |     |    | Ib | I     | + | + | + | Ib |
| 320 | Enterococcus faecalis EnGen0370          | SF339           | GCA_000393255.1 | 106 | 9  | Ib | I     | + | + | + | Ib |
| 321 | Enterococcus faecalis EnGen0374          | B2867           | GCA_000396285.1 | 6   | 2  | Ib | I     | + | + | + | Ib |
| 349 | Enterococcus faecalis EnGen0427          | B388            | GCA_000519965.1 |     |    | Ib | I     | + | + | + | Ib |
| 356 | Enterococcus faecalis ERV41              | ERV41           | GCA_000294125.1 | 2   | 2  | Ib | I     | + | + | + | Ib |
| 358 | Enterococcus faecalis ERV63              | ERV63           | GCA_000294165.2 | 2   | 2  | Ib | I     | + | + | + | Ib |
| 359 | Enterococcus faecalis ERV65              | ERV65           | GCA_000294185.2 | 2   | 2  | Ib | I     | + | + | + | Ib |
| 360 | Enterococcus faecalis ERV68              | ERV68           | GCA_000294205.2 | 2   | 2  | Ib | I     | + | + | + | Ib |
| 361 | Enterococcus faecalis ERV72              | ERV72           | GCA_000294225.2 | 2   | 2  | Ib | I     | + | + | + | Ib |
| 365 | Enterococcus faecalis ERV93              | ERV93           | GCA_000294305.2 | 2   | 2  | Ib | I     | + | + | + | Ib |
| 380 | Enterococcus faecalis Merz96             | Merz96          | GCA_000157315.1 | 103 | -  | Ib | I     | + | + | + | Ib |
| 392 | Enterococcus faecalis R712               | R712            | GCA_000163815.1 | 103 | -  | Ib | I     | + | + | + | Ib |
| 394 | Enterococcus faecalis S613               | S613            | GCA_000163795.1 | 103 | -  | Ib | I     | + | + | + | Ib |
| 399 | Enterococcus faecalis T2                 | T2              | GCA_000157155.1 | 11  | 87 | Ib | I     | + | + | + | Ib |
| 406 | Enterococcus faecalis TX0031             | TX0031          | GCA_000147275.1 |     |    | Ib | I     | + | + | + | Ib |
| 437 | pMG2200                                  | pMG2200         |                 |     |    | Ib | I     | + | + | + | Ib |
| 440 | pY114                                    | pY114           |                 |     |    | Ib | I     | + | + | + | Ib |
| 17  | Enterococcus faecalis                    | 132_EFLS        | GCA_001053375.1 |     |    | Ib | I, IV | + | + | + | Ib |
| 19  | Enterococcus faecalis                    | 133_EFLS        | GCA_001053455.1 |     |    | Ib | I, IV | + | + | + | Ib |
| 69  | Enterococcus faecalis                    | 751_EFLS        | GCA_001058285.1 |     |    | Ib | I, IV | + | + | + | Ib |
| 107 | Enterococcus faecalis 918                | 918             | GCA_000690925.1 |     |    | Ib | I, IV | + | + | + | Ib |
| 232 | Enterococcus faecalis EnGen0232          | UAA948          | GCA_000396905.1 | 26  | 26 | Ia | I, IV | + | + | + | Ia |
| 252 | Enterococcus faecalis EnGen0253          | EnGen0253       | GCA_000396865.1 | 26  | 26 | Ia | I, IV | + | + | + | Ia |
| 22  | Enterococcus faecalis                    | 136_EFLS        | GCA_001053515.1 |     |    | Ia | Ia    | + | + |   | Ia |
| 29  | Enterococcus faecalis                    | 210_EFLS        | GCA_001054585.1 |     |    | Ia | Ia    | + | + |   | Ia |
| 68  | Enterococcus faecalis                    | 739_EFLS        | GCA_001059045.1 |     |    | Ia | Ia    | + | + |   | Ia |
| 70  | Enterococcus faecalis                    | 754_EFLS        | GCA_001058335.1 |     |    | Ia | Ia    | + | + |   | Ia |
| 73  | Enterococcus faecalis                    | 879_EFLS        | GCA_001058715.1 |     |    | Ia | Ia    | + | + |   | Ia |
| 117 | Enterococcus faecalis ATCC 6055          | ATCC 6055       | GCA_000393375.1 | 113 | -  | Ia | Ia    | + | + |   | Ia |
| 131 | Enterococcus faecalis DS5                | DS5             | GCA_000157235.1 | 55  | 55 | Ia | Ia    | + | + |   | Ia |
| 136 | Enterococcus faecalis EnGen0059          | C19315 led 1b p | GCA_000390625.1 |     |    | Ia | Ia    | + | + |   | Ia |
| 140 | Enterococcus faecalis EnGen0063          | C19315WT        | GCA_000390605.1 |     |    | Ia | Ia    | + | + |   | Ia |
| 215 | Enterococcus faecalis EnGen0212          | B3336           | GCA_000396385.1 | 6   | 2  | Ia | Ia    | + | + |   | Ia |
| 344 | Enterococcus faecalis EnGen0422          | B350            | GCA_000519865.1 |     |    | Ia | Ia    | + | + |   | Ia |
| 390 | Enterococcus faecalis PF3                | PF3             | GCA_000505585.1 |     |    | Ia | Ia    | + | + |   | Ia |
| 410 | Enterococcus faecalis TX0109             | TX0109          | GCA_000148105.1 |     |    | Ia | Ia    | + | + |   | Ia |
| 416 | Enterococcus faecalis TX0630             | TX0630          | GCA_000147255.1 | 9   | 9  | Ia | Ia    | + | + |   | Ia |
| 417 | Enterococcus faecalis TX0645             | TX0645          | GCA_000148205.1 | 10  | 10 | Ia | Ia    | + | + |   | Ia |
| 419 | Enterococcus faecalis TX0860             | TX0860          | GCA_000148085.1 | 11  | 87 | Ia | Ia    | + | + |   | Ia |
| 427 | Enterococcus faecalis TX2137             | TX2137          | GCA_000147595.1 | 16  | 16 | Ia | Ia    | + | + |   | Ia |
| 430 | Enterococcus faecalis TX4244             | TX4244          | GCA_000147295.1 | 27  | -  | Ia | Ia    | + | + |   | Ia |
| 439 | pY112                                    | pY112           |                 |     |    | Ia | Ia    | + | + |   | Ia |
| 101 | Enterococcus faecalis 20-SD-BW-06        | 20-SD-BW-06     | GCA_000415025.1 |     |    | Ib | Ib    | + | + |   | Ib |
| 102 | Enterococcus faecalis 20-SD-BW-08        | 20-SD-BW-08     | GCA_000415205.1 |     |    | Ib | Ib    | + | + |   | Ib |
| 177 | Enterococcus faecalis EnGen0101          | UAA823          | GCA_000391585.1 | 6   | 2  | Ib | Ib    | + | + |   | Ib |
| 269 | Enterococcus faecalis EnGen0298          | SF105           | GCA_000394895.1 | 9   | 9  | Ib | Ib    | + | + |   | Ib |



|     |                                   |             |                 |     |     |
|-----|-----------------------------------|-------------|-----------------|-----|-----|
| 84  | Enterococcus faecalis             | DBH18       | GCA_001563075.1 |     |     |
| 85  | Enterococcus faecalis             | ICU1-2c     | GCA_001594365.1 |     |     |
| 86  | Enterococcus faecalis             | LD33        | GCA_001598635.1 |     |     |
| 87  | Enterococcus faecalis             | LRS29212    | GCA_000763355.1 |     |     |
| 88  | Enterococcus faecalis             | MA2         | GCA_000763435.1 |     |     |
| 89  | Enterococcus faecalis             | MB 5259     | GCA_000696265.1 |     |     |
| 90  | Enterococcus faecalis             | NGS-ED-1009 | GCA_000739195.1 |     |     |
| 91  | Enterococcus faecalis             | P8-1        | GCA_001400055.1 |     |     |
| 92  | Enterococcus faecalis             | P9-1        | GCA_001400065.1 |     |     |
| 93  | Enterococcus faecalis             | XJ05        | GCA_001263775.1 |     |     |
| 95  | Enterococcus faecalis 02-MB-P-10  | 02-MB-P-10  | GCA_000415005.1 |     |     |
| 96  | Enterococcus faecalis 06-MB-DW-09 | 06-MB-DW-09 | GCA_000415145.1 |     |     |
| 97  | Enterococcus faecalis 06-MB-S-04  | 06-MB-S-04  | GCA_000415125.1 |     |     |
| 98  | Enterococcus faecalis 06-MB-S-10  | 06-MB-S-10  | GCA_000415105.1 |     |     |
| 99  | Enterococcus faecalis 10244       | 10244       | GCA_000438765.1 | 6   | 2   |
| 100 | Enterococcus faecalis 13-SD-W-01  | 13-SD-W-01  | GCA_000415185.1 |     |     |
| 103 | Enterococcus faecalis 20.SD.W.06  | 20.SD.W.06  | GCA_000415225.1 |     |     |
| 105 | Enterococcus faecalis 62          | 62          | GCA_000211255.1 | 66  | -   |
| 106 | Enterococcus faecalis 68A         | 68A         | GCA_000712065.1 |     |     |
| 108 | Enterococcus faecalis ARO1/DG     | ARO1/DG     | GCA_000157275.1 | 108 | -   |
| 109 | Enterococcus faecalis ATCC 10100  | ATCC 10100  | GCA_000393395.1 |     |     |
| 110 | Enterococcus faecalis ATCC 19433  | ATCC 19433  | GCA_000392875.1 |     |     |
| 111 | Enterococcus faecalis ATCC 27275  | ATCC 27275  | GCA_000395245.1 |     |     |
| 112 | Enterococcus faecalis ATCC 27959  | ATCC 27959  | GCA_000395265.1 | 40  | 40  |
| 113 | Enterococcus faecalis ATCC 29200  | ATCC 29200  | GCA_000159655.1 | 21  | 21  |
| 114 | Enterococcus faecalis ATCC 29212  | ATCC 29212  | GCA_000742975.1 |     |     |
| 115 | Enterococcus faecalis ATCC 35038  | ATCC 35038  | GCA_000392955.1 |     |     |
| 116 | Enterococcus faecalis ATCC 4200   | ATCC 4200   | GCA_000157195.1 | 105 | -   |
| 118 | Enterococcus faecalis AZ19        | AZ19        | GCA_000647995.1 |     |     |
| 120 | Enterococcus faecalis BM4539      | BM4539      | GCA_000479085.1 |     |     |
| 122 | Enterococcus faecalis CBRD01      | CBRD01      | GCA_000499025.1 |     |     |
| 123 | Enterococcus faecalis CH188       | CH188       | GCA_000157495.1 | 9   | 9   |
| 124 | Enterococcus faecalis D32         | D32         | GCA_000281195.1 | 40  | 40  |
| 125 | Enterococcus faecalis D6          | D6          | GCA_000157455.1 | 16  | 16  |
| 126 | Enterococcus faecalis D811610-10  | D811610-10  | GCA_000415065.1 | 32  | -   |
| 129 | Enterococcus faecalis DENG1       | DENG1       | GCA_000550745.1 | 191 | -   |
| 134 | Enterococcus faecalis Efa HS0914  | Efa HS0914  | GCA_000717435.1 |     |     |
| 135 | Enterococcus faecalis EnGen0058   | 2630V05     | GCA_000390705.1 |     |     |
| 137 | Enterococcus faecalis EnGen0060   | 7330257-1   | GCA_000390805.1 |     |     |
| 139 | Enterococcus faecalis EnGen0062   | B16457      | GCA_000390525.1 | 250 | -   |
| 143 | Enterococcus faecalis EnGen0066   | B84847      | GCA_000390585.1 |     |     |
| 148 | Enterococcus faecalis EnGen0071   | 7430416-3   | GCA_000390905.1 |     |     |
| 149 | Enterococcus faecalis EnGen0072   | 7430821-4   | GCA_000390925.1 |     |     |
| 150 | Enterococcus faecalis EnGen0073   | 2924        | GCA_000390725.1 | 116 | 116 |
| 151 | Enterococcus faecalis EnGen0074   | 182970      | GCA_000390665.1 |     |     |
| 152 | Enterococcus faecalis EnGen0075   | 19116       | GCA_000390685.1 |     |     |
| 153 | Enterococcus faecalis EnGen0076   | 1.45E+06    | GCA_000390645.1 |     |     |
| 154 | Enterococcus faecalis EnGen0078   | 7330082-2   | GCA_000390745.1 | 40  | 40  |
| 155 | Enterococcus faecalis EnGen0079   | 7330245-2   | GCA_000390785.1 | 47  | -   |
| 156 | Enterococcus faecalis EnGen0080   | 7330112-3   | GCA_000390765.1 |     |     |
| 157 | Enterococcus faecalis EnGen0081   | 7330259-5   | GCA_000390825.1 |     |     |
| 158 | Enterococcus faecalis EnGen0082   | 7330948-5   | GCA_000390845.1 |     |     |
| 159 | Enterococcus faecalis EnGen0083   | 7430275-3   | GCA_000390865.1 |     |     |
| 160 | Enterococcus faecalis EnGen0084   | 7430315-3   | GCA_000390885.1 |     |     |
| 162 | Enterococcus faecalis EnGen0086   | HEF39       | GCA_000391545.1 |     |     |
| 169 | Enterococcus faecalis EnGen0093   | B2207       | GCA_000391265.1 |     |     |
| 178 | Enterococcus faecalis EnGen0102   | UAA902      | GCA_000391605.1 |     |     |
| 179 | Enterococcus faecalis EnGen0103   | UAA903      | GCA_000391625.1 |     |     |
| 180 | Enterococcus faecalis EnGen0104   | UAA904      | GCA_000391645.1 |     |     |
| 181 | Enterococcus faecalis EnGen0105   | UAA905      | GCA_000391665.1 | 32  | -   |
| 191 | Enterococcus faecalis EnGen0115   | UAA769      | GCA_000391565.1 | 59  | 59  |
| 192 | Enterococcus faecalis EnGen0116   | UAA906      | GCA_000391685.1 | 32  | -   |
| 193 | Enterococcus faecalis EnGen0117   | UAA907      | GCA_000391705.1 |     |     |
| 194 | Enterococcus faecalis EnGen0118   | UAA943      | GCA_000391725.1 | 32  | -   |
| 201 | Enterococcus faecalis EnGen0198   | B1921       | GCA_000396065.1 |     |     |
| 211 | Enterococcus faecalis EnGen0208   | B2949       | GCA_000396305.1 | 6   | 2   |
| 217 | Enterococcus faecalis EnGen0214   | B4018       | GCA_000396425.1 | 6   | 2   |
| 218 | Enterococcus faecalis EnGen0215   | B4148       | GCA_000396445.1 | 6   | 2   |
| 224 | Enterococcus faecalis EnGen0221   | B4568       | GCA_000396565.1 | 6   | 2   |
| 226 | Enterococcus faecalis EnGen0223   | B4672       | GCA_000396605.1 | 6   | 2   |
| 229 | Enterococcus faecalis EnGen0226   | B5076       | GCA_000396665.1 | 6   | 2   |
| 233 | Enterococcus faecalis EnGen0233   | UAA1014     | GCA_000396985.1 |     |     |
| 234 | Enterococcus faecalis EnGen0234   | UAA1180     | GCA_000393715.1 | 23  | 10  |

|     |                                 |           |                 |     |    |
|-----|---------------------------------|-----------|-----------------|-----|----|
| 235 | Enterococcus faecalis EnGen0235 | UAA1489   | GCA_000393795.1 | 6   | 2  |
| 236 | Enterococcus faecalis EnGen0237 | SF24397   | GCA_000394075.1 | 2   | 2  |
| 237 | Enterococcus faecalis EnGen0238 | SF24413   | GCA_000394095.1 | 2   | 2  |
| 239 | Enterococcus faecalis EnGen0240 | SS-6      | GCA_000394135.1 |     |    |
| 240 | Enterococcus faecalis EnGen0241 | FA2-2     | GCA_000394155.1 | 8   | 8  |
| 241 | Enterococcus faecalis EnGen0242 | V587      | GCA_000394175.1 | 6   | 2  |
| 242 | Enterococcus faecalis EnGen0243 | SF28073   | GCA_000394195.1 | 2   | 2  |
| 243 | Enterococcus faecalis EnGen0244 | RM4679    | GCA_000394215.1 | 9   | 9  |
| 244 | Enterococcus faecalis EnGen0245 | T14       | GCA_000394235.1 | 9   | 9  |
| 245 | Enterococcus faecalis EnGen0246 | CH19      | GCA_000394255.1 | 9   | 9  |
| 246 | Enterococcus faecalis EnGen0247 | WH257     | GCA_000394275.1 | 9   | 9  |
| 248 | Enterococcus faecalis EnGen0249 | Com 2     | GCA_000394375.1 | 34  | -  |
| 249 | Enterococcus faecalis EnGen0250 | Com 6     | GCA_000394395.1 | 21  | 21 |
| 250 | Enterococcus faecalis EnGen0251 | WH571     | GCA_000394335.1 |     |    |
| 253 | Enterococcus faecalis EnGen0279 | 12107     | GCA_000395035.1 |     |    |
| 254 | Enterococcus faecalis EnGen0280 | CH570     | GCA_000394855.1 | 6   | 2  |
| 255 | Enterococcus faecalis EnGen0281 | Pan7      | GCA_000395075.1 | 21  | 21 |
| 256 | Enterococcus faecalis EnGen0282 | T13       | GCA_000394995.1 |     |    |
| 257 | Enterococcus faecalis EnGen0283 | 5952      | GCA_000395405.1 |     |    |
| 258 | Enterococcus faecalis EnGen0284 | Com1      | GCA_000395175.1 |     |    |
| 259 | Enterococcus faecalis EnGen0285 | RC73      | GCA_000395305.1 | 40  | 40 |
| 260 | Enterococcus faecalis EnGen0286 | T15       | GCA_000478325.1 |     |    |
| 261 | Enterococcus faecalis EnGen0287 | Y16-1     | GCA_000395095.1 | 28  | 87 |
| 262 | Enterococcus faecalis EnGen0289 | DS16      | GCA_000395285.1 |     |    |
| 263 | Enterococcus faecalis EnGen0290 | RM3817    | GCA_000395385.1 |     |    |
| 264 | Enterococcus faecalis EnGen0291 | T16       | GCA_000394975.1 | 19  | 19 |
| 265 | Enterococcus faecalis EnGen0293 | E1        | GCA_000395205.1 | 40  | 40 |
| 267 | Enterococcus faecalis EnGen0295 | T21       | GCA_000395135.1 | 30  | 30 |
| 268 | Enterococcus faecalis EnGen0297 | HH22      | GCA_000160155.1 | 6   | 2  |
| 270 | Enterococcus faecalis EnGen0299 | UAA409    | GCA_000394455.1 | 8   | 8  |
| 273 | Enterococcus faecalis EnGen0302 | CH116     | GCA_000394935.1 | 9   | 9  |
| 274 | Enterococcus faecalis EnGen0303 | Ned10     | GCA_000394875.1 | 9   | 9  |
| 275 | Enterococcus faecalis EnGen0304 | SF24396   | GCA_000395055.1 | 21  | 21 |
| 276 | Enterococcus faecalis EnGen0306 | CH136     | GCA_000394955.1 | 9   | 9  |
| 279 | Enterococcus faecalis EnGen0311 | TX0635    | GCA_000148125.1 | 9   | 9  |
| 280 | Enterococcus faecalis EnGen0326 | Merz204   | GCA_000393555.1 |     |    |
| 281 | Enterococcus faecalis EnGen0327 | A-3-1     | GCA_000393495.1 | 40  | 40 |
| 282 | Enterococcus faecalis EnGen0328 | A-2-1     | GCA_000393615.1 |     |    |
| 283 | Enterococcus faecalis EnGen0329 | Merz192   | GCA_000393535.1 | 40  | 40 |
| 285 | Enterococcus faecalis EnGen0331 | Merz89    | GCA_000393515.1 | 40  | 40 |
| 287 | Enterococcus faecalis EnGen0333 | T4        | GCA_000393595.1 |     |    |
| 288 | Enterococcus faecalis EnGen0334 | D1        | GCA_000393575.1 |     |    |
| 289 | Enterococcus faecalis EnGen0335 | SF5039    | GCA_000393565.1 | 64  | 64 |
| 290 | Enterococcus faecalis EnGen0336 | T5        | GCA_000393015.1 | 68  | -  |
| 294 | Enterococcus faecalis EnGen0340 | B653      | GCA_000393335.1 | 111 | -  |
| 295 | Enterococcus faecalis EnGen0341 | SF6375    | GCA_000392755.1 | 64  | 64 |
| 296 | Enterococcus faecalis EnGen0342 | SS-7      | GCA_000393115.1 | 72  | 90 |
| 297 | Enterococcus faecalis EnGen0344 | 12030     | GCA_000392795.1 | 63  | 58 |
| 299 | Enterococcus faecalis EnGen0346 | T20       | GCA_000392855.1 |     |    |
| 300 | Enterococcus faecalis EnGen0348 | D3        | GCA_000392915.1 | 47  | -  |
| 301 | Enterococcus faecalis EnGen0350 | T17       | GCA_000392995.1 | 66  | -  |
| 302 | Enterococcus faecalis EnGen0351 | T9        | GCA_000393035.1 | 69  | -  |
| 303 | Enterococcus faecalis EnGen0352 | T10       | GCA_000393055.1 |     |    |
| 304 | Enterococcus faecalis EnGen0354 | RMC1      | GCA_000393135.1 | 90  | 8  |
| 305 | Enterococcus faecalis EnGen0355 | T19       | GCA_000393155.1 |     |    |
| 308 | Enterococcus faecalis EnGen0358 | Merz151   | GCA_000393235.1 |     |    |
| 310 | Enterococcus faecalis EnGen0360 | RMC65     | GCA_000393315.1 |     |    |
| 312 | Enterococcus faecalis EnGen0362 | T12       | GCA_000392895.1 | 36  | -  |
| 313 | Enterococcus faecalis EnGen0363 | RMC5      | GCA_000392935.1 | 53  | -  |
| 315 | Enterococcus faecalis EnGen0365 | F1        | GCA_000393095.1 | 72  | 90 |
| 317 | Enterococcus faecalis EnGen0367 | D173      | GCA_000393355.1 | 112 | 8  |
| 319 | Enterococcus faecalis EnGen0369 | 14366     | GCA_000393175.1 | 94  | -  |
| 322 | Enterococcus faecalis EnGen0400 | EnGen0400 | GCA_000519425.1 |     |    |
| 323 | Enterococcus faecalis EnGen0401 | EnGen0401 | GCA_000519445.1 |     |    |
| 324 | Enterococcus faecalis EnGen0402 | EnGen0402 | GCA_000519465.1 |     |    |
| 325 | Enterococcus faecalis EnGen0403 | EnGen0403 | GCA_000519485.1 |     |    |
| 326 | Enterococcus faecalis EnGen0404 | EnGen0404 | GCA_000519505.1 |     |    |
| 327 | Enterococcus faecalis EnGen0405 | EnGen0405 | GCA_000519525.1 |     |    |
| 328 | Enterococcus faecalis EnGen0406 | EnGen0406 | GCA_000519545.1 |     |    |
| 329 | Enterococcus faecalis EnGen0407 | EnGen0407 | GCA_000519565.1 |     |    |
| 330 | Enterococcus faecalis EnGen0408 | EnGen0408 | GCA_000519585.1 |     |    |
| 331 | Enterococcus faecalis EnGen0409 | EnGen0409 | GCA_000519605.1 |     |    |
| 332 | Enterococcus faecalis EnGen0410 | EnGen0410 | GCA_000519625.1 |     |    |

|     |                                         |                 |                 |     |     |
|-----|-----------------------------------------|-----------------|-----------------|-----|-----|
| 333 | Enterococcus faecalis EnGen0411         | EnGen0411       | GCA_000519645.1 |     |     |
| 334 | Enterococcus faecalis EnGen0412         | EnGen0412       | GCA_000519665.1 |     |     |
| 335 | Enterococcus faecalis EnGen0413         | EnGen0413       | GCA_000519685.1 |     |     |
| 336 | Enterococcus faecalis EnGen0414         | EnGen0414       | GCA_000519705.1 |     |     |
| 337 | Enterococcus faecalis EnGen0415         | EnGen0415       | GCA_000519725.1 |     |     |
| 338 | Enterococcus faecalis EnGen0416         | EnGen0416       | GCA_000519745.1 |     |     |
| 339 | Enterococcus faecalis EnGen0417         | EnGen0417       | GCA_000519765.1 |     |     |
| 340 | Enterococcus faecalis EnGen0418         | EnGen0418       | GCA_000519785.1 |     |     |
| 341 | Enterococcus faecalis EnGen0419         | EnGen0419       | GCA_000519805.1 |     |     |
| 342 | Enterococcus faecalis EnGen0420         | EnGen0420       | GCA_000519825.1 |     |     |
| 343 | Enterococcus faecalis EnGen0421         | EnGen0421       | GCA_000519845.1 |     |     |
| 345 | Enterococcus faecalis EnGen0423         | EnGen0423       | GCA_000519885.1 |     |     |
| 346 | Enterococcus faecalis EnGen0424         | EnGen0424       | GCA_000519905.1 |     |     |
| 347 | Enterococcus faecalis EnGen0425         | EnGen0425       | GCA_000519925.1 |     |     |
| 348 | Enterococcus faecalis EnGen0426         | EnGen0426       | GCA_000519945.1 |     |     |
| 350 | Enterococcus faecalis ERV103            | ERV103          | GCA_000294005.2 | 2   | 2   |
| 351 | Enterococcus faecalis ERV116            | ERV116          | GCA_000294025.2 | 2   | 2   |
| 352 | Enterococcus faecalis ERV129            | ERV129          | GCA_000294045.1 | 2   | 2   |
| 353 | Enterococcus faecalis ERV25             | ERV25           | GCA_000294065.2 | 2   | 2   |
| 354 | Enterococcus faecalis ERV31             | ERV31           | GCA_000294085.2 | 2   | 2   |
| 357 | Enterococcus faecalis ERV62             | ERV62           | GCA_000294145.2 | 2   | 2   |
| 362 | Enterococcus faecalis ERV73             | ERV73           | GCA_000294245.2 |     |     |
| 363 | Enterococcus faecalis ERV81             | ERV81           | GCA_000294265.2 | 2   | 2   |
| 364 | Enterococcus faecalis ERV85             | ERV85           | GCA_000294285.2 | 2   | 2   |
| 366 | Enterococcus faecalis F01966            | F01966          | GCA_000415165.1 |     |     |
| 367 | Enterococcus faecalis FL2               | FL2             | GCA_000648015.1 |     |     |
| 368 | Enterococcus faecalis Fly1              | Fly1            | GCA_000157415.1 | 101 | -   |
| 369 | Enterococcus faecalis GA2               | GA2             | GCA_000648035.1 |     |     |
| 370 | Enterococcus faecalis GAN13             | GAN13           | GCA_000648055.1 | 141 | 141 |
| 372 | Enterococcus faecalis JH1               | JH1             | GCA_000157375.1 | 40  | 40  |
| 373 | Enterococcus faecalis JH2-2             | JH2-2           | GCA_000479105.1 |     |     |
| 374 | Enterococcus faecalis KI-6-1-110608-1   | KI-6-1-110608-1 | GCA_000414985.1 |     |     |
| 375 | Enterococcus faecalis KS19              | KS19            | GCA_000648075.1 | 165 | -   |
| 376 | Enterococcus faecalis LA3B-2            | LA3B-2          | GCA_000415465.2 |     |     |
| 377 | Enterococcus faecalis M7                | M7              | GCA_000320325.1 | 92  | 1   |
| 378 | Enterococcus faecalis MA1               | MA1             | GCA_000524625.1 |     |     |
| 379 | Enterococcus faecalis MD6               | MD6             | GCA_000648095.1 | 258 |     |
| 381 | Enterococcus faecalis MN16              | MN16            | GCA_000648115.1 | 71  | -   |
| 382 | Enterococcus faecalis MTmid8            | MTmid8          | GCA_000648135.1 | 249 | -   |
| 384 | Enterococcus faecalis NBRC 100480       | NBRC 100480     | GCA_001544235.1 |     |     |
| 385 | Enterococcus faecalis NJ44              | NJ44            | GCA_000648175.1 | 4   | 4   |
| 386 | Enterococcus faecalis NY9               | NY9             | GCA_000648195.1 |     |     |
| 387 | Enterococcus faecalis OG1RF             | OG1RF           | GCA_000172575.2 | 1   | 1   |
| 388 | Enterococcus faecalis OG1X              | OG1X            | GCA_000320305.1 | 92  | 1   |
| 389 | Enterococcus faecalis PC1.1             | PC1.1           | GCA_000178175.1 | 40  | 40  |
| 391 | Enterococcus faecalis R508              | R508            | GCA_000294325.2 | 479 |     |
| 393 | Enterococcus faecalis RP2S-4            | RP2S-4          | GCA_000415245.2 |     |     |
| 396 | Enterococcus faecalis str. Symbioflor 1 | Symbioflor 1    | GCA_000317915.1 | 248 | 25  |
| 397 | Enterococcus faecalis T1                | T1              | GCA_000157135.1 | 21  | 21  |
| 398 | Enterococcus faecalis T11               | T11             | GCA_000157475.1 | 65  | -   |
| 400 | Enterococcus faecalis T3                | T3              | GCA_000157175.1 | 67  | -   |
| 401 | Enterococcus faecalis T8                | T8              | GCA_000161875.1 | 8   | 8   |
| 402 | Enterococcus faecalis TUSoD Efl1        | TUSoD Efl1      | GCA_000175015.1 | 364 |     |
| 404 | Enterococcus faecalis TX0017            | TX0017          | GCA_000147905.1 |     |     |
| 405 | Enterococcus faecalis TX0027            | TX0027          | GCA_000147535.1 |     |     |
| 407 | Enterococcus faecalis TX0043            | TX0043          | GCA_000147515.1 | 19  | 19  |
| 408 | Enterococcus faecalis TX0102            | TX0102          | GCA_000147215.1 |     |     |
| 409 | Enterococcus faecalis TX0104            | TX0104          | GCA_000159255.1 | 2   | 2   |
| 411 | Enterococcus faecalis TX0309A           | TX0309A         | GCA_000147555.1 | 6   | 2   |
| 412 | Enterococcus faecalis TX0309B           | TX0309B         | GCA_000147575.1 | 6   | 2   |
| 413 | Enterococcus faecalis TX0312            | TX0312          | GCA_000148305.1 | 21  | 21  |
| 414 | Enterococcus faecalis TX0411            | TX0411          | GCA_000148185.1 |     |     |
| 415 | Enterococcus faecalis TX0470            | TX0470          | GCA_000148265.1 | 110 | -   |
| 418 | Enterococcus faecalis TX0855            | TX0855          | GCA_000148045.1 | 4   | 4   |
| 420 | Enterococcus faecalis TX1302            | TX1302          | GCA_000147495.1 |     |     |
| 421 | Enterococcus faecalis TX1322            | TX1322          | GCA_000159275.1 | 64  | 64  |
| 422 | Enterococcus faecalis TX1341            | TX1341          | GCA_000148225.1 | 287 |     |
| 423 | Enterococcus faecalis TX1342            | TX1342          | GCA_000147475.1 |     |     |
| 424 | Enterococcus faecalis TX1346            | TX1346          | GCA_000147455.1 | 412 |     |
| 425 | Enterococcus faecalis TX1467            | TX1467          | GCA_000205205.1 |     |     |
| 426 | Enterococcus faecalis TX2134            | TX2134          | GCA_000148065.1 | 30  | 30  |
| 428 | Enterococcus faecalis TX2141            | TX2141          | GCA_000148165.1 | 25  | 25  |
| 429 | Enterococcus faecalis TX4000            | TX4000          | GCA_000148445.1 | 8   | 8   |

|     |                                     |        |                 |    |    |
|-----|-------------------------------------|--------|-----------------|----|----|
| 431 | <i>Enterococcus faecalis</i> TX4248 | TX4248 | GCA_000147925.1 | 40 | 40 |
| 433 | <i>Enterococcus faecalis</i> V583   | V583   | GCA_000007785.1 | 6  | 2  |
| 434 | <i>Enterococcus faecalis</i> VC1B-1 | VC1B-1 | GCA_000415405.1 |    |    |
| 436 | <i>Enterococcus faecalis</i> X98    | X98    | GCA_000157515.1 | 19 | 19 |

---
